# Supplementary material for: A W1 computational study on the kinetics of initial pyrolysis of a biodiesel model: methyl propanoate
Source: Royal Society of Chemistry journal article supplement (doi:10.1039/d1nj03636j), 2021-01-01
Supplement: d1nj03636j1.pdf [file d1nj03636j1.pdf]

## Electronic Supplementary Information (ESI) for

### A W1 Computational Study on the Kinetics of Initial Pyrolysis of Biodiesel Model: Methyl Propanoate

Mohamed A. Abdel-Rahman,<sup>a,\*</sup> Ahmed M. El-Nahas,<sup>b,\*</sup> John M. Simmie,<sup>c</sup> Safwat Abdel-Azeim,<sup>d</sup> Safinaz H. El-Demerdash,<sup>b</sup> Asmaa B. El-Meligy,<sup>b</sup> Mohamed A. M. Mahmoud<sup>e</sup>

<sup>a</sup> Chemistry Department, Faculty of Science, Suez University, Suez, 43518, Egypt

<sup>b</sup> Chemistry Department, Faculty of Science, Menoufia University, Shebin El-Kom, 32512, Egypt

<sup>c</sup> School of Chemistry & Combustion Chemistry Centre, National University of Ireland, Galway, Ireland

<sup>d</sup> Center for Integrative Petroleum Research (CIPR), College of Petroleum Engineering and Geosciences, King Fahd University of Petroleum and Minerals (KFUPM), Dhahran 31261, Saudi Arabia

<sup>e</sup> Basic Sciences Department, Tanta Higher Institute of Engineering and Technology, 31511, Tanta, Egypt

\*Corresponding authors:

E-mail: [amelnahas@hotmail.com](mailto:amelnahas@hotmail.com) (Ahmed M. El-Nahas)

E-mail: [Mohamed.Abdel-Rahman@sci.suezuni.edu.eg](mailto:Mohamed.Abdel-Rahman@sci.suezuni.edu.eg) (Mohamed A. Abdel-Rahman)

[mohammadadel2015@yahoo.com](mailto:mohammadadel2015@yahoo.com) (Mohamed A. Abdel-Rahman)

**Table 1S.** Optimized structures of MePr and their transition states for unimolecular decomposition at W1 level.

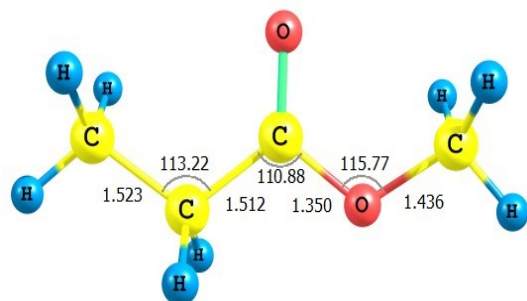

**MePr (A)**

|   |              |              |              |
|---|--------------|--------------|--------------|
| 6 | -1.213664000 | -0.735594000 | -0.000003000 |
| 1 | -1.173016000 | -1.396802000 | 0.868884000  |
| 1 | -1.172928000 | -1.396644000 | -0.869009000 |
| 6 | 0.051184000  | 0.091857000  | 0.000139000  |
| 8 | 0.105304000  | 1.295638000  | 0.000020000  |
| 8 | 1.144609000  | -0.700230000 | 0.000015000  |
| 6 | 2.409338000  | -0.019529000 | -0.000097000 |
| 1 | 2.507493000  | 0.606018000  | -0.885670000 |
| 1 | 2.507768000  | 0.605785000  | 0.885612000  |
| 1 | 3.162986000  | -0.801008000 | -0.000313000 |
| 6 | -2.482619000 | 0.105992000  | -0.000002000 |
| 1 | -2.526722000 | 0.749493000  | -0.877500000 |
| 1 | -3.363496000 | -0.535800000 | -0.000110000 |
| 1 | -2.526825000 | 0.749339000  | 0.877604000  |

Rotational constants (GHZ): 9.5550804      2.1335621      1.8029798

**Energies**

|                       |             |                  |             |
|-----------------------|-------------|------------------|-------------|
| W1U Electronic Energy | -307.839086 |                  |             |
| W1U (0 K)=            | -307.722947 | W1U Energy=      | -307.715466 |
| W1U Enthalpy=         | -307.714522 | W1U Free Energy= | -307.754919 |

**FREQUENCIES (in cm<sup>-1</sup>)**

|          |           |           |           |           |
|----------|-----------|-----------|-----------|-----------|
| 38.9264  | 656.7671  | 1200.7614 | 1495.7512 | 3107.3757 |
| 126.6074 | 816.2987  | 1219.1439 | 1501.1827 | 3113.5436 |
| 154.4334 | 859.6700  | 1285.7509 | 1504.3725 | 3117.3517 |
| 207.5327 | 979.1429  | 1384.2165 | 1797.2100 | 3149.7440 |
| 215.2524 | 1031.5883 | 1423.5580 | 3037.4374 |           |
| 329.5376 | 1106.2400 | 1464.8604 | 3045.0365 |           |
| 444.8824 | 1112.4055 | 1473.4132 | 3049.1601 |           |
| 583.7386 | 1175.8014 | 1485.5020 | 3061.0188 |           |

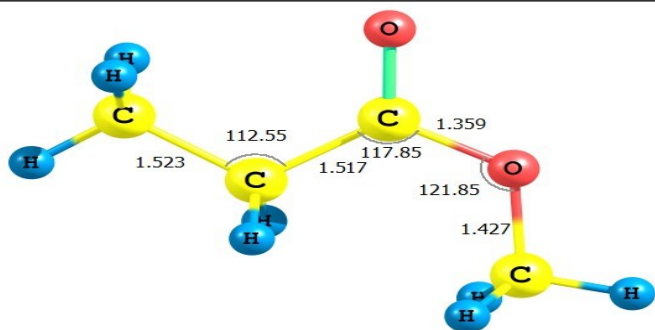

**MePr (B)**

|   |              |              |              |
|---|--------------|--------------|--------------|
| 6 | -2.241599000 | -0.588682000 | -0.000052000 |
| 1 | -2.564088000 | -0.030173000 | 0.876954000  |
| 1 | -2.563922000 | -0.030223000 | -0.877151000 |
| 1 | -2.744602000 | -1.555871000 | -0.000073000 |
| 6 | -0.730011000 | -0.778386000 | 0.000098000  |
| 1 | -0.414123000 | -1.360329000 | 0.870348000  |
| 1 | -0.413954000 | -1.360372000 | -0.870062000 |
| 6 | 0.021895000  | 0.539728000  | 0.000153000  |
| 8 | -0.514237000 | 1.613660000  | -0.000100000 |
| 8 | 1.380317000  | 0.495838000  | -0.000034000 |
| 6 | 2.094073000  | -0.740333000 | -0.000016000 |
| 1 | 1.879678000  | -1.331659000 | -0.891271000 |
| 1 | 3.146317000  | -0.469828000 | -0.000176000 |
| 1 | 1.879909000  | -1.331497000 | 0.891402000  |

Rotational constants (GHZ): 6.23136 2.56590 1.88079

**Energies**

W1U Electronic Energy -307.827286

W1U (0 K)= -307.711194 W1UEnergy= -307.703869

W1U Enthalpy= -307.702925 W1U Free Energy= -307.742494

**FREQUENCIES (in cm<sup>-1</sup>)**

|          |           |           |           |           |
|----------|-----------|-----------|-----------|-----------|
| 82.5596  | 581.9490  | 1169.6602 | 1500.1209 | 3089.4926 |
| 119.1341 | 780.7698  | 1233.9364 | 1503.2279 | 3109.6515 |
| 190.5398 | 823.7355  | 1293.5582 | 1504.7252 | 3119.6845 |
| 216.8580 | 1002.4139 | 1381.4129 | 1818.6567 | 3132.5785 |
| 234.0881 | 1074.9155 | 1425.4807 | 3022.7192 |           |
| 322.2675 | 1098.0346 | 1459.5652 | 3029.2134 |           |
| 526.7418 | 1105.6630 | 1485.3816 | 3046.6401 |           |
| 549.3061 | 1154.3022 | 1495.3529 | 3050.0737 |           |

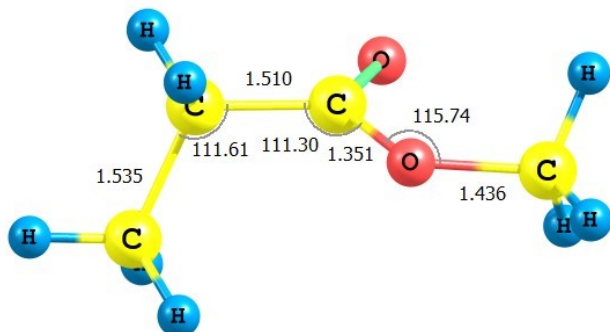

**MePr(C)**

|   |              |              |              |
|---|--------------|--------------|--------------|
| 6 | 2.160984000  | -0.584703000 | 0.481649000  |
| 1 | 3.185601000  | -0.747413000 | 0.148127000  |
| 1 | 2.195088000  | -0.007809000 | 1.406039000  |
| 1 | 1.716458000  | -1.555425000 | 0.698634000  |
| 6 | 1.361575000  | 0.157967000  | -0.598388000 |
| 1 | 1.341306000  | -0.432283000 | -1.514931000 |
| 1 | 1.819454000  | 1.121516000  | -0.813638000 |
| 6 | -0.056124000 | 0.427039000  | -0.154348000 |
| 8 | -0.462073000 | 1.469866000  | 0.293264000  |
| 8 | -0.830159000 | -0.672286000 | -0.290447000 |
| 6 | -2.189997000 | -0.536367000 | 0.151545000  |
| 1 | -2.225095000 | -0.280919000 | 1.209277000  |
| 1 | -2.700012000 | 0.240570000  | -0.415408000 |
| 1 | -2.653573000 | -1.502490000 | -0.023377000 |

Rotational constants (GHZ): 6.6424425 2.4033480 2.0091126

**Energies**

W1U Electronic Energy -307.837693

W1U (0 K)= -307.721244 W1U Energy= -307.713785

W1U Enthalpy= -307.712840 W1U Free Energy= -307.753946

**FREQUENCIES (in cm<sup>-1</sup>)**

|          |           |           |           |           |
|----------|-----------|-----------|-----------|-----------|
| 17.4976  | 757.2029  | 1208.1314 | 1500.6790 | 3103.9989 |
| 122.4340 | 799.6635  | 1237.7023 | 1502.3124 | 3117.7841 |
| 142.1431 | 854.1332  | 1308.6812 | 1511.6392 | 3119.6272 |
| 219.6495 | 959.6671  | 1351.8340 | 1797.5951 | 3149.3764 |
| 270.5053 | 1026.9714 | 1413.3965 | 3038.5651 |           |
| 299.6486 | 1090.0132 | 1471.9554 | 3049.0611 |           |
| 430.2170 | 1104.8868 | 1484.3951 | 3057.5620 |           |
| 617.7427 | 1175.4934 | 1484.7161 | 3096.6332 |           |

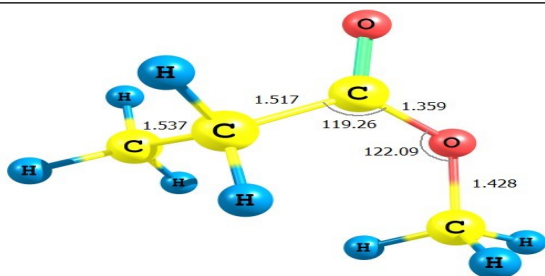

MePr(D)

|   |              |              |              |
|---|--------------|--------------|--------------|
| 6 | -1.786411000 | -0.958880000 | -0.428175000 |
| 1 | -1.178643000 | -1.513073000 | -1.144448000 |
| 1 | -2.509201000 | -1.650403000 | 0.003997000  |
| 1 | -2.331530000 | -0.190178000 | -0.974340000 |
| 6 | -0.930041000 | -0.321020000 | 0.676951000  |
| 1 | -0.408677000 | -1.090796000 | 1.243502000  |
| 1 | -1.574442000 | 0.220245000  | 1.367258000  |
| 6 | 0.019782000  | 0.710947000  | 0.097856000  |
| 8 | -0.313605000 | 1.844947000  | -0.114165000 |
| 8 | 1.281974000  | 0.336593000  | -0.239716000 |
| 6 | 1.775492000  | -0.980303000 | 0.010806000  |
| 1 | 2.768221000  | -1.008400000 | -0.430090000 |
| 1 | 1.857265000  | -1.179186000 | 1.080246000  |
| 1 | 1.157125000  | -1.744993000 | -0.459705000 |

Rotational constants (GHZ): 4.45534 3.17887 2.10588

**Energies**

W1U Electronic Energy -307.824675

W1U (0 K)= -307.708223 W1U Energy= -307.700934

W1U Enthalpy= -307.699989 W1U Free Energy -307.739595

**FREQUENCIES (in cm<sup>-1</sup>)**

|          |           |           |           |           |
|----------|-----------|-----------|-----------|-----------|
| 68.4502  | 718.1711  | 1183.7042 | 1503.3192 | 3094.7885 |
| 128.8304 | 771.0595  | 1235.3869 | 1506.8020 | 3107.0795 |
| 186.4542 | 812.9397  | 1304.3408 | 1515.3741 | 3119.1627 |
| 215.8489 | 973.6815  | 1349.0842 | 1816.0427 | 3132.5510 |
| 244.7770 | 1056.5709 | 1415.4006 | 3028.9753 |           |
| 324.6546 | 1088.0947 | 1481.7759 | 3037.6438 |           |
| 484.4330 | 1098.2801 | 1489.5484 | 3068.7184 |           |

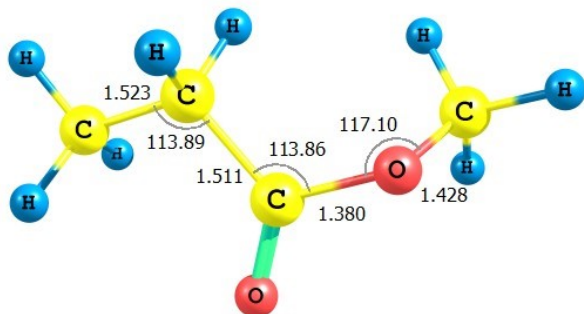

TS(A---B)

|   |              |              |              |
|---|--------------|--------------|--------------|
| 6 | -2.333898000 | -0.380594000 | 0.227666000  |
| 1 | -3.002506000 | -1.231295000 | 0.095747000  |
| 1 | -2.320755000 | -0.116529000 | 1.284650000  |
| 1 | -2.745261000 | 0.468907000  | -0.314879000 |
| 6 | -0.935100000 | -0.718599000 | -0.270820000 |
| 1 | -0.523868000 | -1.583993000 | 0.255263000  |
| 1 | -0.946582000 | -1.007115000 | -1.326064000 |
| 6 | 0.047880000  | 0.423140000  | -0.156431000 |
| 8 | -0.232688000 | 1.542180000  | 0.160444000  |
| 8 | 1.329225000  | 0.098234000  | -0.551876000 |
| 6 | 2.156408000  | -0.565517000 | 0.404007000  |
| 1 | 3.106031000  | -0.754322000 | -0.089029000 |
| 1 | 2.323158000  | 0.069298000  | 1.276889000  |
| 1 | 1.725750000  | -1.518843000 | 0.722339000  |

Rotational constants (GHZ):      6.7632949      2.3291463      1.9273154

### Energies

W1U Electronic Energy      -307.818259

W1U (0 K)=      -307.703083      W1U Energy=      -307.696227

W1U Enthalpy=      -307.695283      W1U Free Energy=      -307.734110

### FREQUENCIES (in cm<sup>-1</sup>)

|           |           |           |           |           |
|-----------|-----------|-----------|-----------|-----------|
| -122.0452 | 606.5239  | 1168.7028 | 1496.0237 | 3066.1527 |
| 64.5036   | 790.1592  | 1208.7399 | 1503.2303 | 3104.9653 |
| 139.0456  | 826.3218  | 1287.8652 | 1506.0635 | 3115.0885 |
| 196.3729  | 992.0120  | 1378.0755 | 1826.6697 | 3130.1922 |
| 242.8495  | 1046.8506 | 1423.1789 | 3007.4077 |           |
| 268.9322  | 1086.8091 | 1455.6168 | 3028.9974 |           |
| 460.9936  | 1111.8636 | 1480.2177 | 3043.8183 |           |
| 575.2113  | 1139.9632 | 1495.0343 | 3051.5878 |           |

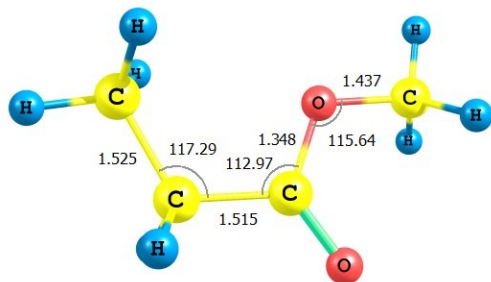

### TS(A---C)

|   |              |              |              |
|---|--------------|--------------|--------------|
| 6 | -2.117294000 | -0.803580000 | -0.000158000 |
| 1 | -3.197912000 | -0.658135000 | -0.000868000 |
| 1 | -1.854944000 | -1.391072000 | -0.878860000 |
| 1 | -1.856098000 | -1.390976000 | 0.878959000  |
| 6 | -1.409095000 | 0.547355000  | 0.000196000  |
| 1 | -1.701991000 | 1.142712000  | -0.867431000 |
| 1 | -1.702104000 | 1.141921000  | 0.868425000  |
| 6 | 0.105693000  | 0.537456000  | 0.000011000  |
| 8 | 0.783785000  | 1.534262000  | -0.000153000 |
| 8 | 0.623664000  | -0.707464000 | 0.000064000  |

|   |             |              |              |
|---|-------------|--------------|--------------|
| 6 | 2.058327000 | -0.783902000 | 0.000023000  |
| 1 | 2.466214000 | -0.299338000 | -0.885254000 |
| 1 | 2.466228000 | -0.300013000 | 0.885669000  |
| 1 | 2.295227000 | -1.843452000 | -0.000363000 |

Rotational constants (GHZ):      6.0976530      2.6613900      1.9182221

**Energies**

W1U Electronic Energy      -307.836991  
W1U (0 K)=      -307.720789 W1U Energy=      -307.714252  
W1U Enthalpy=      -307.713308 W1U Free Energy=      -307.751015

**FREQUENCIES (in cm<sup>-1</sup>)**

|          |           |           |           |           |
|----------|-----------|-----------|-----------|-----------|
| -34.0638 | 615.4089  | 1209.0936 | 1499.3549 | 3101.9006 |
| 129.8940 | 810.9088  | 1263.0430 | 1500.4595 | 3112.5449 |
| 169.6439 | 845.3049  | 1294.9273 | 1506.4412 | 3119.5373 |
| 205.7113 | 967.0935  | 1358.5469 | 1790.8497 | 3150.2094 |
| 240.5060 | 1040.6531 | 1424.9033 | 3041.7506 |           |
| 328.9290 | 1100.9094 | 1463.1648 | 3042.2824 |           |
| 491.3143 | 1114.2147 | 1474.5680 | 3050.3073 |           |
| 593.1308 | 1176.2923 | 1484.7065 | 3065.0690 |           |

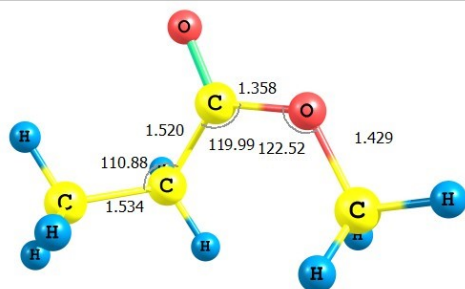

**TS(B--D)**

|   |              |              |              |
|---|--------------|--------------|--------------|
| 6 | 1.989574000  | -0.796087000 | -0.389703000 |
| 1 | 1.607713000  | -1.164841000 | -1.342677000 |
| 1 | 2.554348000  | 0.114292000  | -0.580969000 |
| 1 | 2.666801000  | -1.547888000 | 0.014801000  |
| 6 | 0.850027000  | -0.515887000 | 0.598699000  |
| 1 | 0.287919000  | -1.424896000 | 0.796693000  |
| 1 | 1.270805000  | -0.181664000 | 1.548249000  |
| 6 | -0.021944000 | 0.628846000  | 0.109606000  |
| 8 | 0.413237000  | 1.738654000  | -0.036666000 |
| 8 | -1.329201000 | 0.408560000  | -0.185045000 |
| 6 | -1.935862000 | -0.879709000 | -0.070257000 |
| 1 | -1.952755000 | -1.226356000 | 0.963678000  |
| 1 | -2.957908000 | -0.750410000 | -0.415924000 |
| 1 | -1.439975000 | -1.618930000 | -0.700233000 |

Rotational constants (GHZ):      5.0803887      2.8294163      2.0160031

**Energies**

W1U Electronic Energy      -307.823940  
W1U (0 K)=      -307.707649 W1U Energy=      -307.701175  
W1U Enthalpy=      -307.700231 W1U Free Energy=      -307.737812

**FREQUENCIES (in cm<sup>-1</sup>)**

|          |           |           |           |           |
|----------|-----------|-----------|-----------|-----------|
| -52.0781 | 689.9345  | 1174.5429 | 1502.3036 | 3096.2648 |
| 117.6591 | 781.3732  | 1233.7813 | 1508.0985 | 3106.8908 |
| 202.8253 | 807.7324  | 1296.1525 | 1513.5891 | 3125.0607 |
| 222.0165 | 981.7706  | 1366.3827 | 1812.9643 | 3131.9294 |
| 259.6395 | 1069.9622 | 1413.9127 | 3026.6939 |           |
| 316.3607 | 1089.2619 | 1481.7909 | 3037.4176 |           |
| 483.1799 | 1099.3517 | 1487.7500 | 3056.9804 |           |
| 568.2495 | 1168.3810 | 1500.2695 | 3092.6978 |           |

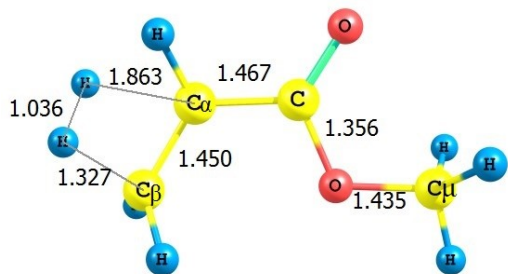

### TS1

|   |              |              |              |
|---|--------------|--------------|--------------|
| 6 | 1.343861000  | 0.427066000  | -0.051242000 |
| 1 | 1.797182000  | 1.335403000  | -0.401243000 |
| 1 | 3.097802000  | 0.664902000  | 0.529837000  |
| 6 | 2.060895000  | -0.833717000 | -0.060071000 |
| 1 | 2.405715000  | -1.272850000 | 0.866923000  |
| 1 | 1.656234000  | -1.624464000 | -0.704917000 |
| 1 | 3.211432000  | -0.172004000 | -0.069293000 |
| 6 | -0.119277000 | 0.516980000  | -0.001362000 |
| 8 | -0.742420000 | 1.555880000  | 0.015900000  |
| 8 | -0.703993000 | -0.705593000 | 0.031116000  |
| 6 | -2.139055000 | -0.706673000 | 0.010049000  |
| 1 | -2.531354000 | -0.193123000 | 0.886200000  |
| 1 | -2.511707000 | -0.210125000 | -0.884664000 |
| 1 | -2.432542000 | -1.751980000 | 0.016786000  |

**Rotational constants (GHZ):** 6.3658688 2.5496878 1.8660241

### Energies

|                       |             |                  |             |
|-----------------------|-------------|------------------|-------------|
| W1U Electronic Energy | -307.638425 |                  |             |
| W1U (0 K)=            | -307.533507 | W1U Energy=      | -307.526040 |
| W1U Enthalpy=         | -307.525096 | W1U Free Energy= | -307.564786 |

### FREQUENCIES (in cm<sup>-1</sup>)

|            |           |           |           |           |
|------------|-----------|-----------|-----------|-----------|
| -1775.7734 | 516.3818  | 1143.9549 | 1472.0111 | 3116.0579 |
| 101.9237   | 632.5859  | 1174.1539 | 1484.0409 | 3147.4076 |
| 132.4414   | 793.3747  | 1192.9544 | 1500.4727 | 3149.4460 |
| 150.9722   | 837.1148  | 1209.5937 | 1593.4993 | 3260.2212 |
| 190.9129   | 919.3557  | 1233.7702 | 1747.2100 |           |
| 277.4807   | 975.1662  | 1310.9394 | 1872.3255 |           |
| 324.3749   | 1027.9989 | 1376.8451 | 2983.6756 |           |
| 400.2152   | 1040.1967 | 1418.0046 | 3047.9757 |           |



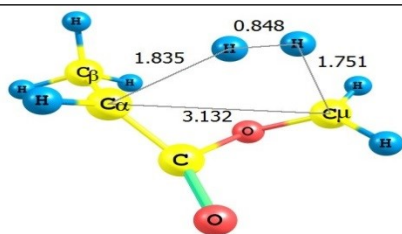

### TS2

|   |              |              |              |
|---|--------------|--------------|--------------|
| 6 | 1.116807000  | 0.465092000  | 0.373102000  |
| 1 | 1.494495000  | 1.262415000  | 1.002143000  |
| 1 | 0.050282000  | -0.468252000 | 1.538575000  |
| 6 | 2.117533000  | -0.523997000 | -0.153875000 |
| 1 | 1.665447000  | -1.240212000 | -0.833953000 |
| 1 | 2.922851000  | -0.011549000 | -0.688419000 |
| 1 | 2.586476000  | -1.082031000 | 0.659439000  |
| 6 | -0.133886000 | 0.751856000  | -0.156329000 |
| 8 | -0.955031000 | 1.615051000  | -0.113391000 |
| 8 | -0.666557000 | -0.686493000 | -0.587596000 |
| 6 | -1.593973000 | -1.092045000 | 0.190331000  |
| 1 | -0.644201000 | -0.940501000 | 1.653983000  |
| 1 | -2.343212000 | -0.396229000 | 0.556578000  |
| 1 | -1.798327000 | -2.157541000 | 0.200176000  |

Rotational constants (GHZ): 4.9311389 3.0263199 2.1327463

### Energies

W1U Electronic Energy -307.670329

W1U (0 K)= -307.565124 W1U Energy= -307.557875

W1U Enthalpy= -307.556931 W1U Free Energy= -307.595922

### FREQUENCIES (in cm<sup>-1</sup>)

|          |           |           |           |           |
|----------|-----------|-----------|-----------|-----------|
| -772.889 | 544.6260  | 1074.9252 | 1420.6701 | 3087.4691 |
| 98.5625  | 613.9027  | 1090.4904 | 1490.4648 | 3130.8095 |
| 134.7277 | 695.7733  | 1116.9005 | 1506.4662 | 3159.8961 |
| 193.0642 | 726.3900  | 1156.8107 | 1541.2939 | 3201.7536 |
| 276.2677 | 776.6006  | 1196.4679 | 1878.6516 |           |
| 319.1729 | 833.1710  | 1220.5440 | 2690.1813 |           |
| 374.1863 | 911.2974  | 1383.2224 | 3012.6446 |           |
| 516.4184 | 1050.1263 | 1407.7377 | 3051.2069 |           |

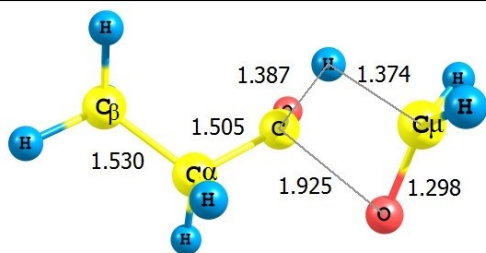

### TS3

|   |              |              |              |
|---|--------------|--------------|--------------|
| 6 | -0.973996000 | -0.569297000 | -0.409565000 |
| 1 | -0.579861000 | -1.561145000 | -0.217611000 |
| 1 | -1.084022000 | -0.461035000 | -1.489188000 |
| 6 | 0.037312000  | 0.465805000  | 0.003977000  |
| 8 | 0.090158000  | 1.638066000  | -0.076079000 |
| 8 | 1.569838000  | -0.477662000 | -0.677926000 |
| 6 | 1.806451000  | -0.459426000 | 0.598296000  |

|   |              |              |              |
|---|--------------|--------------|--------------|
| 1 | 1.976467000  | -1.409880000 | 1.130288000  |
| 1 | 2.352337000  | 0.390391000  | 1.036005000  |
| 1 | 0.602985000  | -0.084592000 | 1.144096000  |
| 6 | -2.305544000 | -0.326523000 | 0.304834000  |
| 1 | -2.689440000 | 0.671477000  | 0.098560000  |
| 1 | -3.039833000 | -1.054049000 | -0.040287000 |
| 1 | -2.203942000 | -0.437752000 | 1.384933000  |

Rotational constants (GHZ): 5.8904406 2.4153940 2.0223197

**Energies**

W1U Electronic Energy -307.708918  
W1U (0 K)= -307.599074 W1U Energy= -307.592044  
W1U Enthalpy= -307.591100 W1U Free Energy= -307.629763

**FREQUENCIES (in cm<sup>-1</sup>)**

|           |           |           |           |           |
|-----------|-----------|-----------|-----------|-----------|
| -1143.322 | 553.9090  | 1204.0624 | 1497.3283 | 3067.3863 |
| 90.8648   | 693.9250  | 1260.1685 | 1507.0045 | 3102.1133 |
| 192.4502  | 726.3867  | 1280.2788 | 1527.6962 | 3111.2646 |
| 215.1803  | 808.3823  | 1308.4999 | 1611.8844 | 3149.6356 |
| 241.7373  | 918.5650  | 1339.9735 | 1922.3353 |           |
| 314.0800  | 1009.6693 | 1417.5753 | 2913.0382 |           |
| 358.1460  | 1089.1409 | 1472.1059 | 2972.8351 |           |
| 407.8306  | 1149.3592 | 1476.5192 | 3039.0106 |           |

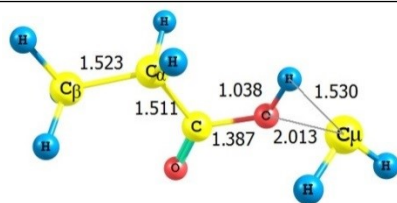

**TS4**

|   |              |              |              |
|---|--------------|--------------|--------------|
| 6 | 0.883078000  | -0.705095000 | -0.351150000 |
| 1 | 0.916636000  | -0.882053000 | -1.430594000 |
| 6 | 2.286533000  | -0.572516000 | 0.225457000  |
| 1 | 2.810682000  | 0.274445000  | -0.213728000 |
| 1 | 2.253354000  | -0.415118000 | 1.302648000  |
| 1 | 2.862640000  | -1.476017000 | 0.028024000  |
| 6 | 0.029651000  | 0.521956000  | -0.131738000 |
| 8 | 0.392002000  | 1.556525000  | 0.340777000  |
| 8 | -1.278851000 | 0.407757000  | -0.576194000 |
| 1 | -3.296808000 | -0.254285000 | 0.463289000  |
| 6 | -2.420162000 | -0.910469000 | 0.429613000  |
| 1 | -1.543096000 | -0.575858000 | -0.779028000 |
| 1 | -1.938398000 | -0.822449000 | 1.411806000  |
| 1 | 0.355186000  | -1.566175000 | 0.067823000  |

Rotational constants (GHZ): 5.6648519 2.2090544 1.7961745

**Energies**

W1U Electronic Energy -307.680047  
W1U (0 K)= -307.572336 W1U Energy= -307.564302  
W1U Enthalpy= -307.563358 W1U Free Energy= -307.604837

**FREQUENCIES (in cm<sup>-1</sup>)**

|          |           |           |           |           |
|----------|-----------|-----------|-----------|-----------|
| -511.487 | 472.7260  | 1064.2876 | 1464.8049 | 3052.0715 |
| 63.8582  | 560.9218  | 1112.4425 | 1495.9331 | 3093.7110 |
| 73.3282  | 625.2989  | 1126.1463 | 1504.0248 | 3111.5826 |
| 141.7741 | 771.7190  | 1286.7498 | 1851.2106 | 3118.5558 |
| 208.3111 | 816.4705  | 1299.5188 | 2653.7512 |           |
| 231.5569 | 830.0665  | 1383.3463 | 3012.4608 |           |
| 281.4443 | 1007.0557 | 1405.8466 | 3025.7030 |           |
| 346.5752 | 1032.9461 | 1425.2787 | 3048.3421 |           |

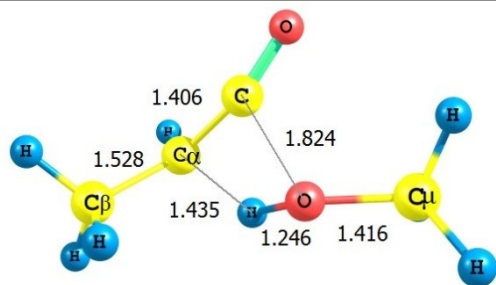

**TS5**

|   |              |              |              |
|---|--------------|--------------|--------------|
| 6 | 1.226662000  | 0.197718000  | 0.564818000  |
| 1 | 1.722905000  | 0.887817000  | 1.242876000  |
| 1 | 0.132195000  | -0.723308000 | 0.683457000  |
| 6 | 2.174260000  | -0.688112000 | -0.242848000 |
| 1 | 1.628766000  | -1.343030000 | -0.918540000 |
| 1 | 2.876407000  | -0.096963000 | -0.835120000 |
| 1 | 2.754510000  | -1.312309000 | 0.435735000  |
| 6 | 0.117586000  | 0.800989000  | -0.054704000 |
| 8 | -0.564212000 | 1.728586000  | -0.228884000 |
| 8 | -0.721651000 | -0.809657000 | -0.220344000 |
| 6 | -2.093125000 | -0.742393000 | 0.125596000  |
| 1 | -2.234998000 | -0.634513000 | 1.206249000  |
| 1 | -2.554241000 | 0.115670000  | -0.370081000 |
| 1 | -2.590933000 | -1.654006000 | -0.207930000 |

Rotational constants (GHZ): 5.1407488 2.6221948 1.8890457

**Energies**

W1U Electronic Energy -307.709609

**FREQUENCIES (in cm<sup>-1</sup>)**

|           |           |           |           |           |
|-----------|-----------|-----------|-----------|-----------|
| -1782.363 | 517.7495  | 1138.5500 | 1498.8473 | 3077.2172 |
| 104.3218  | 587.7793  | 1169.9318 | 1499.6682 | 3082.9439 |
| 145.8138  | 675.1543  | 1170.8944 | 1512.5632 | 3106.8371 |
| 165.2907  | 842.9645  | 1336.8122 | 1808.5573 | 3126.1328 |
| 177.5122  | 895.2202  | 1344.3404 | 2032.5197 |           |
| 201.0224  | 1045.0942 | 1419.6311 | 2989.5598 |           |
| 248.8661  | 1063.5873 | 1470.4064 | 3023.8279 |           |
| 324.4099  | 1090.3213 | 1495.0021 | 3050.7751 |           |

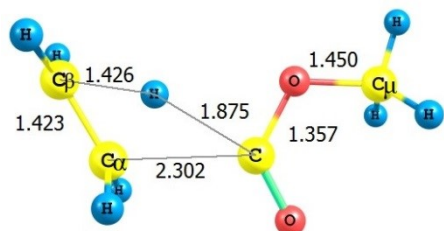

**TS6**

|   |              |              |              |
|---|--------------|--------------|--------------|
| 6 | -0.309632000 | 0.449126000  | -0.000856000 |
| 8 | -0.864838000 | 1.513096000  | -0.003706000 |
| 6 | 1.991969000  | 0.484906000  | 0.007231000  |
| 1 | 1.910348000  | 1.048649000  | 0.922864000  |
| 1 | 1.915213000  | 1.069980000  | -0.895380000 |
| 6 | 2.695670000  | -0.751803000 | -0.004595000 |
| 1 | 2.926139000  | -1.237254000 | -0.939050000 |
| 1 | 2.921876000  | -1.257399000 | 0.920159000  |
| 1 | 1.286715000  | -0.534217000 | -0.006422000 |
| 8 | -0.953695000 | -0.744944000 | 0.001866000  |
| 6 | -2.403469000 | -0.703320000 | 0.000320000  |
| 1 | -2.764940000 | -0.181525000 | 0.884536000  |
| 1 | -2.763306000 | -0.188517000 | -0.888656000 |
| 1 | -2.731004000 | -1.738389000 | 0.004066000  |

Rotational constants (GHZ): 6.5518698 1.7675676 1.4314055

**Energies**

W1U Electronic Energy -307.649199

W1U (0 K)= -307.541713 W1U Energy= -307.534133

W1U Enthalpy= -307.533189 W1U Free Energy= -307.573908

**FREQUENCIES (in cm<sup>-1</sup>)**

|           |           |           |           |           |
|-----------|-----------|-----------|-----------|-----------|
| -1524.348 | 360.0865  | 1108.6752 | 1480.9945 | 3165.5384 |
| 21.655    | 532.8583  | 1152.7761 | 1492.6370 | 3168.9411 |
| 73.9279   | 725.7681  | 1183.2510 | 1495.9052 | 3249.0940 |
| 83.7728   | 739.2282  | 1206.1627 | 1760.6387 | 3278.5330 |
| 114.3356  | 767.1396  | 1236.5442 | 2281.5393 |           |
| 247.3306  | 912.4403  | 1273.2231 | 3049.1068 |           |
| 285.9162  | 949.9968  | 1447.6589 | 3120.6434 |           |
| 325.9838  | 1021.5598 | 1456.6209 | 3150.4238 |           |

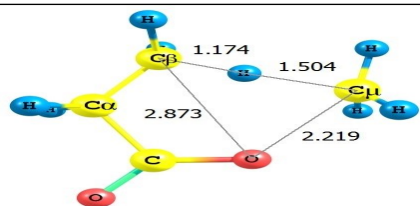**TS7**

|   |              |              |              |
|---|--------------|--------------|--------------|
| 1 | 1.921788000  | -1.461282000 | -0.882948000 |
| 6 | 2.113824000  | -0.917944000 | 0.025227000  |
| 1 | 1.890385000  | -1.432482000 | 0.942906000  |
| 8 | -0.087499000 | -1.193530000 | -0.009447000 |
| 6 | -0.991071000 | -0.305796000 | -0.002260000 |
| 8 | -2.202381000 | -0.456813000 | -0.035289000 |
| 6 | -0.506078000 | 1.212845000  | 0.088188000  |
| 1 | -1.100963000 | 1.690631000  | -0.688285000 |
| 6 | 0.943165000  | 1.487924000  | -0.073143000 |
| 1 | 1.253425000  | 1.857240000  | -1.048202000 |
| 1 | 1.430283000  | 0.420995000  | -0.016027000 |
| 1 | -0.876745000 | 1.536116000  | 1.059722000  |
| 1 | 3.009664000  | -0.304313000 | 0.031804000  |
| 1 | 1.432163000  | 2.033666000  | 0.730843000  |

Rotational constants (GHZ): 4.8711853 2.7260983 1.8121315

**Energies**

W1U Electronic Energy -307.686448  
W1U (0 K)= -307.578011 W1U Energy= -307.570578  
W1U Enthalpy= -307.569634 W1U Free Energy= -307.610245

**FREQUENCIES (in cm<sup>-1</sup>)**

|          |           |           |           |           |
|----------|-----------|-----------|-----------|-----------|
| -694.848 | 563.7570  | 1064.9917 | 1439.6759 | 3113.0123 |
| 34.5617  | 601.9122  | 1134.4869 | 1455.4640 | 3145.5746 |
| 77.3927  | 622.1959  | 1188.4265 | 1488.1254 | 3247.0807 |
| 157.5807 | 776.2775  | 1252.1482 | 1710.6028 | 3311.5418 |
| 281.7964 | 798.0341  | 1318.7294 | 2069.9948 |           |
| 350.7028 | 859.1300  | 1321.4081 | 3063.1323 |           |
| 419.6903 | 982.7512  | 1343.4620 | 3075.8847 |           |
| 487.0043 | 1043.1289 | 1438.1521 | 3085.3346 |           |

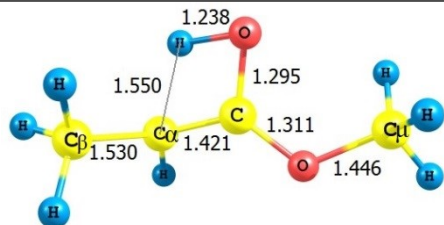

**TS8**

|                             |              |              |              |                               |
|-----------------------------|--------------|--------------|--------------|-------------------------------|
| 6                           | -1.257112000 | -0.350147000 | -0.567474000 |                               |
| 1                           | -1.304503000 | -1.267156000 | -1.148336000 |                               |
| 1                           | -0.888315000 | 1.150652000  | -0.691808000 |                               |
| 6                           | 0.042202000  | 0.033735000  | -0.137864000 |                               |
| 8                           | 0.155719000  | 1.321163000  | -0.048911000 |                               |
| 8                           | 1.075539000  | -0.755775000 | 0.030699000  |                               |
| 6                           | 2.376212000  | -0.142267000 | 0.179673000  |                               |
| 1                           | 2.472968000  | 0.279287000  | 1.177463000  |                               |
| 1                           | 3.095109000  | -0.942539000 | 0.034819000  |                               |
| 1                           | 2.506903000  | 0.642250000  | -0.562001000 |                               |
| 6                           | -2.418985000 | -0.195540000 | 0.415833000  |                               |
| 1                           | -2.313816000 | 0.698166000  | 1.032182000  |                               |
| 1                           | -3.359998000 | -0.104389000 | -0.127320000 |                               |
| 1                           | -2.512322000 | -1.054056000 | 1.089686000  |                               |
| Rotational constants (GHZ): |              |              |              | 8.7736379 2.1413086 1.8801627 |

**Energies**

W1U Electronic Energy -307.713520  
W1U (0 K)= -307.602948 W1U Energy= -307.595816  
W1U Enthalpy= -307.594872 W1U Free Energy= -307.633928

**FREQUENCIES (in cm<sup>-1</sup>)**

|           |           |           |           |           |
|-----------|-----------|-----------|-----------|-----------|
| -2052.434 | 707.7188  | 1151.1342 | 1497.5958 | 3086.8521 |
| 110.3332  | 741.7713  | 1173.0858 | 1503.4605 | 3112.9587 |
| 111.5664  | 842.4134  | 1207.7271 | 1516.5365 | 3136.1534 |
| 176.5870  | 878.4986  | 1295.3628 | 1530.6818 | 3157.5295 |
| 215.6844  | 965.1191  | 1406.2687 | 1969.8117 |           |
| 284.8307  | 1044.8308 | 1425.7043 | 2989.5061 |           |
| 308.0589  | 1079.4928 | 1482.1576 | 3056.6990 |           |
| 459.2278  | 1100.1926 | 1490.8986 | 3058.0031 |           |

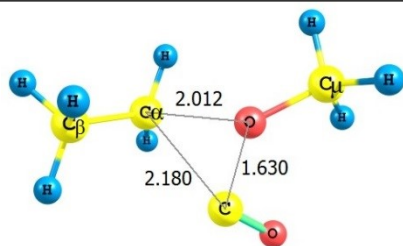

### TS9

|   |              |              |              |
|---|--------------|--------------|--------------|
| 6 | -1.236160000 | -0.129343000 | 0.678524000  |
| 1 | -1.062303000 | -1.107921000 | 1.107192000  |
| 1 | -1.163843000 | 0.661891000  | 1.409525000  |
| 6 | -2.342175000 | -0.050239000 | -0.309420000 |
| 1 | -2.143732000 | -0.683719000 | -1.171251000 |
| 1 | -2.514118000 | 0.966603000  | -0.649305000 |
| 1 | -3.252627000 | -0.432260000 | 0.171191000  |
| 6 | 0.367970000  | 1.041228000  | -0.220416000 |
| 8 | 1.382428000  | 1.546481000  | 0.076652000  |
| 8 | 0.413941000  | -0.579970000 | -0.380059000 |
| 6 | 1.571377000  | -1.302538000 | 0.039909000  |
| 1 | 2.116564000  | -1.662272000 | -0.834427000 |
| 1 | 2.227486000  | -0.662537000 | 0.634169000  |
| 1 | 1.255547000  | -2.166521000 | 0.628574000  |

Rotational constants (GHZ): 4.8607811 2.5211937 1.8582214

### Energies

W1U Electronic Energy -307.666765

W1U (0 K)= -307.556886 W1U Energy= -307.548575

W1U Enthalpy= -307.547631 W1U Free Energy= -307.589400

### FREQUENCIES (in cm<sup>-1</sup>)

|          |           |           |           |           |
|----------|-----------|-----------|-----------|-----------|
| -759.44  | 335.9605  | 1144.8393 | 1491.8248 | 3098.0867 |
| 90.8529  | 440.4158  | 1162.2609 | 1501.2648 | 3131.0399 |
| 98.1769  | 660.2672  | 1183.0355 | 1507.9770 | 3145.8269 |
| 125.3916 | 791.0566  | 1228.8646 | 1878.5324 | 3218.1368 |
| 188.6509 | 895.4349  | 1400.6197 | 2988.3012 |           |
| 216.1897 | 955.5750  | 1433.5743 | 3007.1410 |           |
| 233.5799 | 972.8662  | 1455.6816 | 3074.6444 |           |
| 262.1441 | 1094.8212 | 1473.6863 | 3079.1583 |           |

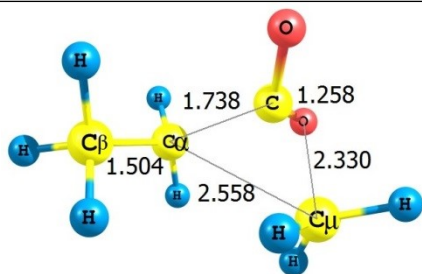

### TS10

|   |              |              |              |
|---|--------------|--------------|--------------|
| 6 | 0.897778000  | -0.201827000 | -0.779413000 |
| 6 | 2.077989000  | 0.073702000  | 0.110439000  |
| 6 | -0.628066000 | -0.388938000 | 0.030787000  |
| 8 | -1.564554000 | -0.407078000 | -0.808306000 |
| 8 | -0.484616000 | -0.890196000 | 1.153729000  |

|   |              |              |              |
|---|--------------|--------------|--------------|
| 1 | 0.756624000  | 0.498486000  | -1.594288000 |
| 1 | 0.918511000  | -1.212135000 | -1.180386000 |
| 1 | 2.994569000  | -0.109674000 | -0.458089000 |
| 1 | 2.124312000  | 1.106929000  | 0.456239000  |
| 1 | 2.073539000  | -0.584777000 | 0.975871000  |
| 6 | -0.719602000 | 1.460280000  | 0.300322000  |
| 1 | 0.136319000  | 1.618845000  | 0.937096000  |
| 1 | -1.675078000 | 1.482181000  | 0.801735000  |
| 1 | -0.704035000 | 1.919035000  | -0.674368000 |

Rotational constants (GHZ): 4.9677209 2.7348070 2.6409773

### Energies

W1U Electronic Energy -307.679552

W1U (0 K)= -307.569641 W1U Energy= -307.561807

W1U Enthalpy= -307.560863 W1U Free Energy= -307.601141

### FREQUENCIES (in $\text{cm}^{-1}$ )

|          |           |           |           |           |
|----------|-----------|-----------|-----------|-----------|
| -470.15  | 395.6545  | 1071.1888 | 1485.0853 | 3125.2323 |
| 87.4778  | 458.8194  | 1151.0767 | 1487.3401 | 3164.3168 |
| 97.9780  | 660.2220  | 1220.7547 | 1502.1214 | 3266.8813 |
| 197.7572 | 759.9204  | 1259.8358 | 1620.6999 | 3282.0928 |
| 252.5467 | 806.3732  | 1288.0200 | 3022.4579 |           |
| 273.5731 | 854.0782  | 1403.6793 | 3071.4205 |           |
| 298.9909 | 959.3353  | 1430.2351 | 3097.1737 |           |
| 339.9687 | 1022.3151 | 1448.2802 | 3117.1701 |           |

**Table 2SA.** T1 diagnostic values at ROCCSD (T)/6-31+G (d) [1<sup>st</sup> single point level of ROCBS-QB3], before and after annihilation spin contamination  $\langle S^2 \rangle$  for different structures at ROB3LYP/6-311G(d,p) level.

| Structure                                                            | T1 diagnostic values | Before annihilation<br>$\langle S^2 \rangle$ | After annihilation<br>$\langle S^2 \rangle$ |
|----------------------------------------------------------------------|----------------------|----------------------------------------------|---------------------------------------------|
| MePr                                                                 | 0.014                | -                                            | -                                           |
| TS1                                                                  | 0.017                | -                                            | -                                           |
| TS2                                                                  | 0.019                | -                                            | -                                           |
| TS3                                                                  | 0.015                | -                                            | -                                           |
| TS4                                                                  | 0.018                | -                                            | -                                           |
| TS5                                                                  | 0.017                | -                                            | -                                           |
| TS6                                                                  | 0.022                | -                                            | -                                           |
| TS7                                                                  | 0.016                | -                                            | -                                           |
| TS8                                                                  | 0.017                | -                                            | -                                           |
| TS9                                                                  | 0.028                | -                                            | -                                           |
| TS10                                                                 | 0.026                | -                                            | -                                           |
| $\bullet\text{CH}_3$                                                 | 0.015                | 0.7536                                       | 0.7500                                      |
| $\bullet\text{CH}_2\text{C}(\text{O})\text{OCH}_3$                   | 0.019                | 0.7539                                       | 0.7500                                      |
| $\text{CH}_3\bullet\text{CH}_2$                                      | 0.015                | 0.7540                                       | 0.7500                                      |
| $\bullet\text{C}(\text{O})\text{OCH}_3$                              | 0.025                | 0.7532                                       | 0.7500                                      |
| $\text{CH}_3\text{CH}_2\bullet(\text{O})$                            | 0.021                | 0.7529                                       | 0.7500                                      |
| $\bullet\text{OCH}_3$                                                | 0.019                | 0.7535                                       | 0.7500                                      |
| $\text{CH}_3\text{CH}_2\text{C}(\text{O})\text{O}\bullet$            | 0.022                | 0.7560                                       | 0.7500                                      |
| $\bullet\text{CH}_2\text{CH}_2\text{C}(\text{O})\text{OCH}_3$        | 0.017                | 0.7539                                       | 0.7500                                      |
| $\text{CH}_3\bullet\text{CHC}(\text{O})\text{OCH}_3$                 | 0.018                | 0.7563                                       | 0.7500                                      |
| $\text{CH}_3\text{CH}_2\text{C}(\text{O})\text{O}\bullet\text{CH}_2$ | 0.018                | 0.7539                                       | 0.7500                                      |



**Table 2SB.** Reaction energy ( $\Delta E_0$ ), enthalpy change ( $\Delta H_{298}$ ), Gibbs free energy ( $\Delta G_{298}$ ) for MePr pyrolysis using W1 and ROCBS-QB3 (in parentheses) methods (kcal mol<sup>-1</sup>, T = 298 K, P = 1 atm).

| R   | State                                                                              | W1(ROCBS-QB3)         |                           |                           |
|-----|------------------------------------------------------------------------------------|-----------------------|---------------------------|---------------------------|
|     |                                                                                    | $\Delta E_0^\ddagger$ | $\Delta H_{298}^\ddagger$ | $\Delta G_{298}^\ddagger$ |
|     | <b>MePr</b> [CH <sub>3</sub> CH <sub>2</sub> COOCH <sub>3</sub> ]                  | 0.00                  | 0.00                      | 0.00                      |
| R1  | TS1[CH <sub>2</sub> CHCOOCH <sub>3</sub> --H <sub>2</sub> ]                        | 118.88(117.57)        | 118.87(117.55)            | 119.31(118.05)            |
|     | P1[CH <sub>2</sub> CHCOOCH <sub>3</sub> + H <sub>2</sub> ]                         | 29.59                 | 31.16                     | 23.35                     |
| R2  | TS2[CH <sub>3</sub> CHCOOCH <sub>2</sub> --H <sub>2</sub> ]                        | 97.02(96.11)          | 98.89(96.20)              | 99.77(96.41)              |
|     | P2[CH <sub>3</sub> CHCOOCH <sub>2</sub> +H <sub>2</sub> ]                          | 28.05                 | 29.07                     | 22.52                     |
| R3  | TS3[CH <sub>3</sub> CH <sub>2</sub> CH(O)--CH <sub>2</sub> O]                      | 77.73(78.12)          | 77.45(78.05)              | 78.54(77.12)              |
|     | P3[CH <sub>3</sub> CH <sub>2</sub> CH(O)+CH <sub>2</sub> O]                        | 31.41                 | 32.27                     | 20.75                     |
| R4  | TS4[CH <sub>3</sub> CH <sub>2</sub> COOH--CH <sub>2</sub> ]                        | 94.51(95.25)          | 94.86(95.60)              | 94.18(94.94)              |
|     | P4[CH <sub>3</sub> CH <sub>2</sub> COOH+CH <sub>2</sub> ]                          | 87.25                 | 88.59                     | 77.43                     |
| R5  | TS5[CH <sub>3</sub> CHCO--CH <sub>3</sub> OH]                                      | 77.62(77.44)          | 77.01(77.59)              | 76.58(77.71)              |
|     | P5[CH <sub>3</sub> CHCO+CH <sub>3</sub> OH]                                        | 39.11                 | 40.10                     | 28.07                     |
| R6  | TS6[CH <sub>3</sub> OHC(O)--CH <sub>2</sub> CH <sub>2</sub> ]                      | 113.73(114.57)        | 113.79(114.57)            | 113.59(112.62)            |
|     | P6[CH <sub>3</sub> OHC(O)+CH <sub>2</sub> CH <sub>2</sub> ]                        | 29.41                 | 30.11                     | 19.08                     |
| R7  | TS7[CH <sub>2</sub> CH <sub>2</sub> C(O)O--CH <sub>4</sub> ]                       | 90.95(91.22)          | 90.92(91.01)              | 90.78(90.8)               |
|     | P7[CH <sub>2</sub> CH <sub>2</sub> C(O)O+CH <sub>4</sub> ]                         | 17.77                 | 18.19                     | 9.95                      |
| R8  | TS8[CH <sub>3</sub> CH=C(OH)OCH <sub>3</sub> ]                                     | 75.30(75.95)          | 75.08(75.71)              | 75.92(76.60)              |
|     | P8[CH <sub>3</sub> CH=C(OH)OCH <sub>3</sub> ]                                      | 28.77                 | 28.75                     | 28.57                     |
| R9  | TS9[CH <sub>3</sub> CH <sub>2</sub> OCH <sub>3</sub> --CO]                         | 104.20(103.83)        | 104.73(104.32)            | 103.86(103.60)            |
|     | P9[CH <sub>3</sub> CH <sub>2</sub> OCH <sub>3</sub> +CO]                           | 23.80                 | 24.71                     | 14.38                     |
| R10 | TS10[CH <sub>3</sub> CH <sub>2</sub> CH <sub>3</sub> --CO <sub>2</sub> ]           | 96.02(94.30)          | 96.42(94.42)              | 96.50(94.81)              |
|     | P10[CH <sub>3</sub> CH <sub>2</sub> CH <sub>3</sub> +CO <sub>2</sub> ]             | -16.50                | -16.07                    | -25.15                    |
| R11 | P11 [ $\bullet$ CH <sub>3</sub> + $\bullet$ CH <sub>2</sub> C(O)OCH <sub>3</sub> ] | 85.64(85.70)          | 87.13(87.20)              | 75.54(75.59)              |
| R12 | P12 [CH <sub>3</sub> $\bullet$ CH <sub>2</sub> + $\bullet$ C(O)OCH <sub>3</sub> ]  | 93.72(93.59)          | 94.16(94.88)              | 81.55(81.15)              |
| R13 | P13[CH <sub>3</sub> CH <sub>2</sub> C $\bullet$ (O) + $\bullet$ OCH <sub>3</sub> ] | 100.61(100.67)        | 100.89(101.64)            | 88.94(88.77)              |
| R14 | P14 [CH <sub>3</sub> CH <sub>2</sub> C(O)O $\bullet$ + $\bullet$ CH <sub>3</sub> ] | 87.71(87.21)          | 89.30(88.65)              | 77.12(76.33)              |
| R15 | P15[ $\bullet$ CH <sub>2</sub> CH <sub>2</sub> C(O)OCH <sub>3</sub> + $\bullet$ H] | 100.51(100.72)        | 102.12(102.33)            | 93.47(93.74)              |
| R16 | P16 [CH <sub>3</sub> $\bullet$ CHC(O)OCH <sub>3</sub> + $\bullet$ H]               | 92.70(92.59)          | 93.99(94.05)              | 85.79(85.84)              |
| R17 | P17[CH <sub>3</sub> CH <sub>2</sub> C(O)O $\bullet$ CH <sub>2</sub> + $\bullet$ H] | 97.91(98.10)          | 99.68(99.37)              | 90.59(91.45)              |

**Table 3S.** Unimolecular rate constants  $k_1$  ( $\text{s}^{-1}$ ) of R1 for the reported **MePr** reaction channels obtained by means of TST, TST/W, TST/Eck, W(T), Eck XT) and RRKM theories ( $T = 400\text{--}2000$  K,  $P = 1$  atm)

| $k_1$ , R1, $\text{CH}_3\text{CH}_2\text{C}(\text{O})\text{OCH}_3 \rightarrow \text{CH}_2=\text{CHC}(\text{O})\text{OCH}_3 + \text{H}_2$ |          |          |          |      |       |          |
|------------------------------------------------------------------------------------------------------------------------------------------|----------|----------|----------|------|-------|----------|
| $T$ K                                                                                                                                    | TST      | TST/ W   | TST/Eck  | W    | Eck   | RRKM     |
| 400                                                                                                                                      | 3.62E-53 | 1.06E-52 | 2.35E-51 | 2.93 | 64.95 | 3.75E-53 |
| 500                                                                                                                                      | 6.40E-40 | 1.43E-39 | 3.70E-39 | 2.24 | 5.78  | 6.60E-40 |
| 600                                                                                                                                      | 4.55E-31 | 8.46E-31 | 1.31E-30 | 1.86 | 2.88  | 4.67E-31 |
| 700                                                                                                                                      | 9.87E-25 | 1.61E-24 | 2.04E-24 | 1.63 | 2.07  | 1.01E-24 |
| 800                                                                                                                                      | 5.72E-20 | 8.47E-20 | 9.78E-20 | 1.48 | 1.71  | 5.84E-20 |
| 900                                                                                                                                      | 2.95E-16 | 4.07E-16 | 4.48E-16 | 1.38 | 1.52  | 3.00E-16 |
| 1000                                                                                                                                     | 2.78E-13 | 3.64E-13 | 3.86E-13 | 1.31 | 1.39  | 2.84E-13 |
| 1100                                                                                                                                     | 7.65E-11 | 9.64E-11 | 1.00E-10 | 1.26 | 1.31  | 7.78E-11 |
| 1200                                                                                                                                     | 8.31E-09 | 1.01E-08 | 1.05E-08 | 1.21 | 1.26  | 8.45E-09 |
| 1300                                                                                                                                     | 4.41E-07 | 5.20E-07 | 5.34E-07 | 1.18 | 1.21  | 4.48E-07 |
| 1400                                                                                                                                     | 1.33E-05 | 1.54E-05 | 1.57E-05 | 1.16 | 1.18  | 1.35E-05 |
| 1500                                                                                                                                     | 2.57E-04 | 2.93E-04 | 2.98E-04 | 1.14 | 1.16  | 2.61E-04 |
| 1600                                                                                                                                     | 3.44E-03 | 3.85E-03 | 3.89E-03 | 1.12 | 1.13  | 3.49E-03 |
| 1700                                                                                                                                     | 3.39E-03 | 3.76E-03 | 3.80E-03 | 1.11 | 1.12  | 3.44E-02 |
| 1800                                                                                                                                     | 2.60E-01 | 2.86E-01 | 2.89E-01 | 1.1  | 1.11  | 2.64E-01 |
| 1900                                                                                                                                     | 1.61E+00 | 1.75E+00 | 1.75E+00 | 1.09 | 1.09  | 1.63E+00 |
| 2000                                                                                                                                     | 8.34E+00 | 9.01E+00 | 9.01E+00 | 1.08 | 1.08  | 8.42E+00 |

**Table 4S.** Unimolecular rate constants  $k_2$  ( $s^{-1}$ ) of R2 for the reported **MePr** reaction channels obtained by means of TST, TST/W, TST/Eck, W(T), Eck(T) and RRKM theories ( $T = 400\text{--}2000$  K,  $P = 1$  atm)

| $k_2, R2, CH_3CH_2C(O)OCH_3 \rightarrow CH_3CHC(O)OCH_2 \text{ Cyc} + H_2$ |          |          |          |      |      |          |
|----------------------------------------------------------------------------|----------|----------|----------|------|------|----------|
| $T$ K                                                                      | TST      | TST/W    | TST/Eck  | W    | Eck  | RRKM     |
| 400                                                                        | 4.53E-41 | 5.80E-41 | 6.12E-41 | 1.28 | 1.35 | 2.19E-41 |
| 500                                                                        | 2.63E-30 | 3.10E-30 | 3.18E-30 | 1.18 | 1.21 | 1.32E-30 |
| 600                                                                        | 4.19E-23 | 4.69E-23 | 4.78E-23 | 1.12 | 1.14 | 2.18E-23 |
| 700                                                                        | 6.13E-18 | 6.68E-18 | 6.74E-18 | 1.09 | 1.1  | 3.24E-18 |
| 800                                                                        | 4.72E-14 | 5.05E-14 | 5.10E-14 | 1.07 | 1.08 | 2.52E-14 |
| 900                                                                        | 5.09E-11 | 5.34E-11 | 5.40E-11 | 1.05 | 1.06 | 2.74E-11 |
| 1000                                                                       | 1.38E-08 | 1.44E-08 | 1.45E-08 | 1.04 | 1.05 | 7.48E-09 |
| 1100                                                                       | 1.36E-06 | 1.41E-06 | 1.41E-06 | 1.04 | 1.04 | 7.44E-07 |
| 1200                                                                       | 6.32E-05 | 6.51E-05 | 6.51E-05 | 1.03 | 1.03 | 3.47E-05 |
| 1300                                                                       | 1.64E-03 | 1.69E-03 | 1.69E-03 | 1.03 | 1.03 | 9.00E-04 |
| 1400                                                                       | 2.67E-02 | 2.72E-02 | 2.72E-02 | 1.02 | 1.02 | 1.47E-02 |
| 1500                                                                       | 3.00E-01 | 3.06E-01 | 3.06E-01 | 1.02 | 1.02 | 1.67E-01 |
| 1600                                                                       | 2.53E+00 | 2.58E+00 | 2.58E+00 | 1.02 | 1.02 | 1.40E+00 |
| 1700                                                                       | 1.65E+01 | 1.68E+01 | 1.68E+01 | 1.02 | 1.02 | 9.14E+00 |
| 1800                                                                       | 8.78E+01 | 8.87E+01 | 8.96E+01 | 1.01 | 1.02 | 4.86E+01 |
| 1900                                                                       | 3.92E+02 | 3.96E+02 | 3.96E+02 | 1.01 | 1.01 | 2.16E+02 |
| 2000                                                                       | 1.51E+03 | 1.53E+03 | 1.53E+03 | 1.01 | 1.01 | 8.28E+02 |

**Table 5S.** Unimolecular rate constants  $k_3$  ( $s^{-1}$ ) of R3 for the reported **MePr** reaction channels obtained by means of TST, TST/W, TST/Eck, W(T), Eck(T) and RRKM theories ( $T = 400\text{--}2000$  K,  $P = 1$  atm)

| $K_3, R3, CH_3CH_2C(O)OCH_3 \rightarrow CH_3CH_2CH(O) + CH_2(O)$ |          |          |          |      |      |          |
|------------------------------------------------------------------|----------|----------|----------|------|------|----------|
| $T$ K                                                            | TST      | TST/W    | TST/Eck  | W    | Eck  | RRKM     |
| 400                                                              | 1.30E-30 | 1.96E-30 | 2.31E-30 | 1.51 | 1.78 | 1.34E-30 |
| 500                                                              | 4.78E-22 | 6.36E-22 | 6.84E-22 | 1.33 | 1.43 | 4.89E-22 |
| 600                                                              | 2.51E-16 | 3.09E-16 | 3.19E-16 | 1.23 | 1.27 | 2.56E-16 |
| 700                                                              | 3.11E-12 | 3.64E-12 | 3.70E-12 | 1.17 | 1.19 | 3.16E-12 |
| 800                                                              | 3.69E-09 | 4.17E-09 | 4.21E-09 | 1.13 | 1.14 | 3.74E-09 |
| 900                                                              | 9.17E-07 | 1.01E-06 | 1.02E-06 | 1.1  | 1.11 | 9.28E-07 |
| 1000                                                             | 7.61E-05 | 8.22E-05 | 8.29E-05 | 1.08 | 1.09 | 7.69E-05 |
| 1100                                                             | 2.84E-03 | 3.04E-03 | 3.04E-03 | 1.07 | 1.07 | 2.87E-03 |
| 1200                                                             | 5.83E-02 | 6.18E-02 | 6.18E-02 | 1.06 | 1.06 | 5.88E-02 |
| 1300                                                             | 7.54E-01 | 7.92E-01 | 7.92E-01 | 1.05 | 1.05 | 7.60E-01 |
| 1400                                                             | 6.78E+00 | 7.05E+00 | 7.12E+00 | 1.04 | 1.05 | 6.83E+00 |
| 1500                                                             | 4.56E+01 | 4.74E+01 | 4.74E+01 | 1.04 | 1.04 | 4.59E+01 |
| 1600                                                             | 2.42E+02 | 2.49E+02 | 2.49E+02 | 1.03 | 1.03 | 2.43E+02 |
| 1700                                                             | 1.06E+03 | 1.09E+03 | 1.09E+03 | 1.03 | 1.03 | 1.06E+03 |
| 1800                                                             | 3.92E+03 | 4.04E+03 | 4.04E+03 | 1.03 | 1.03 | 3.90E+03 |
| 1900                                                             | 1.27E+04 | 1.30E+04 | 1.30E+04 | 1.02 | 1.02 | 1.25E+04 |
| 2000                                                             | 3.65E+04 | 3.72E+04 | 3.72E+04 | 1.02 | 1.02 | 3.56E+04 |

**Table 6S.** Unimolecular rate constants  $k_4$  ( $s^{-1}$ ) of R4 for the reported **MePr** reaction channels obtained by means of TST, TST/W, TST/Eck, W(T), Eck (T) and RRKM theories ( $T = 400$ – $2000$  K,  $P = 1$  atm)

| $k_4, R4, CH_3CH_2C(O)OCH_3 \rightarrow CH_3CH_2C(O)OH + C\cdot H_2$ |          |          |          |      |      |          |
|----------------------------------------------------------------------|----------|----------|----------|------|------|----------|
| $T$ K                                                                | TST      | TST/W    | TST/Eck  | W    | Eck  | RRKM     |
| 400                                                                  | 5.58E-39 | 5.97E-39 | 5.97E-39 | 1.07 | 1.07 | 5.71E-39 |
| 500                                                                  | 2.22E-28 | 2.31E-28 | 2.31E-28 | 1.04 | 1.04 | 2.26E-28 |
| 600                                                                  | 2.74E-21 | 2.82E-21 | 2.82E-21 | 1.03 | 1.03 | 2.78E-21 |
| 700                                                                  | 3.28E-16 | 3.35E-16 | 3.35E-16 | 1.02 | 1.02 | 3.33E-16 |
| 800                                                                  | 2.16E-12 | 2.20E-12 | 2.20E-12 | 1.02 | 1.02 | 2.19E-12 |
| 900                                                                  | 2.05E-09 | 2.07E-09 | 2.07E-09 | 1.01 | 1.01 | 2.07E-09 |
| 1000                                                                 | 4.98E-07 | 5.03E-07 | 5.03E-07 | 1.01 | 1.01 | 5.03E-07 |
| 1100                                                                 | 4.48E-05 | 4.52E-05 | 4.57E-05 | 1.01 | 1.02 | 4.53E-05 |
| 1200                                                                 | 1.92E-03 | 1.94E-03 | 1.92E-03 | 1.01 | 1    | 1.93E-03 |
| 1300                                                                 | 4.62E-02 | 4.67E-02 | 4.62E-02 | 1.01 | 1    | 4.65E-02 |
| 1400                                                                 | 7.08E-01 | 7.15E-01 | 7.15E-01 | 1.01 | 1.01 | 7.11E-01 |
| 1500                                                                 | 7.55E+00 | 7.55E+00 | 7.70E+00 | 1    | 1.02 | 7.56E+00 |
| 1600                                                                 | 6.00E+01 | 6.00E+01 | 6.00E+01 | 1    | 1    | 5.95E+01 |
| 1700                                                                 | 3.75E+02 | 3.75E+02 | 7.50E+02 | 1    | 1    | 3.66E+02 |
| 1800                                                                 | 1.91E+03 | 1.91E+03 | 1.97E+03 | 1    | 1.03 | 1.82E+03 |
| 1900                                                                 | 8.21E+03 | 8.21E+03 | 8.37E+03 | 1    | 1.02 | 7.51E+03 |
| 2000                                                                 | 3.05E+04 | 3.05E+04 | 3.05E+04 | 1    | 1    | 2.65E+04 |

**Table 7S.** Unimolecular rate constants  $k_5$  ( $s^{-1}$ ) of R5 for the reported **MePr** reaction channels obtained by means of TST, TST/W, TST/Eck, W(T), Eck(T) and RRKM theories ( $T = 400\text{--}2000$  K,  $P = 1$  atm)

| $k_5$ , R5, $\text{CH}_3\text{CH}_2\text{C}(\text{O})\text{OCH}_3 \rightarrow \text{CH}_3\text{CH}=\text{C}(\text{O}) + \text{CH}_3\text{OH}$ |          |          |          |      |      |          |
|-----------------------------------------------------------------------------------------------------------------------------------------------|----------|----------|----------|------|------|----------|
| $T$ K                                                                                                                                         | TST      | TST/W    | TST/Eck  | W    | Eck  | RRKM     |
| 400                                                                                                                                           | 3.28E-30 | 8.13E-30 | 2.91E-29 | 2.48 | 8.87 | 3.39E-30 |
| 500                                                                                                                                           | 1.33E-21 | 2.59E-21 | 4.27E-21 | 1.95 | 3.21 | 1.37E-21 |
| 600                                                                                                                                           | 7.56E-16 | 1.21E-15 | 1.75E-15 | 1.66 | 2.31 | 7.76E-16 |
| 700                                                                                                                                           | 9.96E-12 | 1.39E-11 | 1.70E-11 | 1.48 | 1.71 | 1.02E-11 |
| 800                                                                                                                                           | 1.24E-08 | 1.58E-08 | 1.85E-08 | 1.37 | 1.49 | 1.27E-08 |
| 900                                                                                                                                           | 3.22E-06 | 3.78E-06 | 4.41E-06 | 1.29 | 1.37 | 3.29E-06 |
| 1000                                                                                                                                          | 2.77E-04 | 3.09E-04 | 3.57E-04 | 1.24 | 1.29 | 2.82E-04 |
| 1100                                                                                                                                          | 1.06E-02 | 1.14E-02 | 1.30E-02 | 1.2  | 1.23 | 1.08E-02 |
| 1200                                                                                                                                          | 2.24E-01 | 2.30E-01 | 2.67E-01 | 1.16 | 1.19 | 2.28E-01 |
| 1300                                                                                                                                          | 2.96E+00 | 2.96E+00 | 3.43E+00 | 1.14 | 1.16 | 3.00E+00 |
| 1400                                                                                                                                          | 2.71E+01 | 2.64E+01 | 3.09E+01 | 1.12 | 1.14 | 2.74E+01 |
| 1500                                                                                                                                          | 1.85E+02 | 1.79E+02 | 2.07E+02 | 1.11 | 1.12 | 1.87E+02 |
| 1600                                                                                                                                          | 9.95E+02 | 9.37E+02 | 1.09E+03 | 1.09 | 1.1  | 9.97E+02 |
| 1700                                                                                                                                          | 4.40E+03 | 4.09E+03 | 4.80E+03 | 1.08 | 1.09 | 4.36E+03 |
| 1800                                                                                                                                          | 1.65E+04 | 1.52E+04 | 1.78E+04 | 1.07 | 1.08 | 1.60E+04 |
| 1900                                                                                                                                          | 5.39E+04 | 4.93E+04 | 5.77E+04 | 1.07 | 1.07 | 5.10E+04 |
| 2000                                                                                                                                          | 1.56E+05 | 1.42E+05 | 1.67E+05 | 1.06 | 1.07 | 1.42E+05 |

**Table 8S.** Unimolecular rate constants  $k_6$  ( $s^{-1}$ ) of R6 for the reported **MePr** reaction channels obtained by means of TST, TST/W, TST/Eck, W(T), Eck (T) and RRKM theories ( $T = 400$ – $2000$  K,  $P = 1$  atm)

| $k_6$ , R6, $\text{CH}_3\text{CH}_2\text{C}(\text{O})\text{OCH}_3 \rightarrow \text{HC}(\text{O})\text{OCH}_3 + \text{CH}_2=\text{CH}_2$ |          |          |          |      |      |          |
|------------------------------------------------------------------------------------------------------------------------------------------|----------|----------|----------|------|------|----------|
| $T$ K                                                                                                                                    | TST      | TST/W    | TST/Eck  | W    | Eck  | RRKM     |
| 400                                                                                                                                      | 3.03E-44 | 6.88E-44 | 1.89E-43 | 2.27 | 6.24 | 3.11E-44 |
| 500                                                                                                                                      | 1.44E-32 | 2.61E-32 | 3.86E-32 | 1.81 | 2.68 | 1.47E-32 |
| 600                                                                                                                                      | 9.26E-25 | 1.44E-24 | 1.76E-24 | 1.56 | 1.9  | 9.43E-25 |
| 700                                                                                                                                      | 3.62E-19 | 5.10E-19 | 5.72E-19 | 1.41 | 1.58 | 3.68E-19 |
| 800                                                                                                                                      | 5.78E-15 | 7.63E-15 | 8.15E-15 | 1.32 | 1.41 | 5.86E-15 |
| 900                                                                                                                                      | 1.09E-11 | 1.36E-11 | 1.43E-11 | 1.25 | 1.31 | 1.10E-11 |
| 1000                                                                                                                                     | 4.60E-09 | 5.52E-09 | 5.70E-09 | 1.2  | 1.24 | 4.65E-09 |
| 1100                                                                                                                                     | 6.51E-07 | 7.62E-07 | 7.75E-07 | 1.17 | 1.19 | 6.57E-07 |
| 1200                                                                                                                                     | 4.05E-05 | 4.62E-05 | 4.70E-05 | 1.14 | 1.16 | 4.09E-05 |
| 1300                                                                                                                                     | 1.34E-03 | 1.50E-03 | 1.51E-03 | 1.12 | 1.13 | 1.35E-03 |
| 1400                                                                                                                                     | 2.70E-02 | 2.97E-02 | 3.00E-02 | 1.1  | 1.11 | 2.72E-02 |
| 1500                                                                                                                                     | 3.65E-01 | 3.98E-01 | 4.02E-01 | 1.09 | 1.1  | 3.67E-01 |
| 1600                                                                                                                                     | 3.57E+00 | 3.86E+00 | 3.89E+00 | 1.08 | 1.09 | 3.58E+00 |
| 1700                                                                                                                                     | 2.67E+01 | 2.86E+01 | 2.88E+01 | 1.07 | 1.08 | 2.66E+01 |
| 1800                                                                                                                                     | 1.60E+02 | 1.70E+02 | 1.71E+02 | 1.06 | 1.07 | 1.57E+02 |
| 1900                                                                                                                                     | 7.95E+02 | 8.43E+02 | 8.43E+02 | 1.06 | 1.06 | 7.67E+02 |
| 2000                                                                                                                                     | 3.37E+03 | 3.54E+03 | 3.54E+03 | 1.05 | 1.05 | 3.15E+03 |

**Table 9S.** Unimolecular rate constants  $k_7$  ( $s^{-1}$ ) of R7 for the reported **MePr** reaction channels obtained by means of TST, TST/W, TST/Eck, W(T), Eck (T) and RRKM theories ( $T = 400$ – $3000$  K,  $P = 1$  atm).

| $k_7, R7, CH_3CH_2C(O)OCH_3 \rightarrow CH_2CH_2C(O)O \text{ Cyc} + CH_4$ |          |          |          |      |      |          |
|---------------------------------------------------------------------------|----------|----------|----------|------|------|----------|
| $T$ K                                                                     | TST      | TST/W    | TST/Eck  | W    | Eck  | RRKM     |
| 400                                                                       | 2.12E-37 | 2.57E-37 | 2.65E-37 | 1.21 | 1.25 | 2.22E-37 |
| 500                                                                       | 2.38E-27 | 2.71E-27 | 2.74E-27 | 1.14 | 1.15 | 2.48E-27 |
| 600                                                                       | 1.25E-20 | 1.36E-20 | 1.38E-20 | 1.09 | 1.1  | 1.30E-20 |
| 700                                                                       | 8.12E-16 | 8.69E-16 | 8.69E-16 | 1.07 | 1.07 | 8.39E-16 |
| 800                                                                       | 3.37E-12 | 3.54E-12 | 3.57E-12 | 1.05 | 1.06 | 3.47E-12 |
| 900                                                                       | 2.23E-09 | 2.32E-09 | 2.32E-09 | 1.04 | 1.04 | 2.29E-09 |
| 1000                                                                      | 4.05E-07 | 4.17E-07 | 4.21E-07 | 1.03 | 1.04 | 4.16E-07 |
| 1100                                                                      | 2.88E-05 | 2.97E-05 | 2.97E-05 | 1.03 | 1.03 | 2.96E-05 |
| 1200                                                                      | 1.01E-03 | 1.03E-03 | 1.03E-03 | 1.02 | 1.02 | 1.04E-03 |
| 1300                                                                      | 2.06E-02 | 2.10E-02 | 2.10E-02 | 1.02 | 1.02 | 2.11E-02 |
| 1400                                                                      | 2.74E-01 | 2.79E-01 | 2.79E-01 | 1.02 | 1.02 | 2.81E-01 |
| 1500                                                                      | 2.59E+00 | 2.64E+00 | 2.64E+00 | 1.02 | 1.02 | 2.65E+00 |
| 1600                                                                      | 1.85E+01 | 1.87E+01 | 1.87E+01 | 1.01 | 1.01 | 1.89E+01 |
| 1700                                                                      | 1.05E+02 | 1.06E+02 | 1.07E+02 | 1.01 | 1.02 | 1.07E+02 |
| 1800                                                                      | 4.91E+02 | 4.96E+02 | 5.01E+02 | 1.01 | 1.02 | 4.97E+02 |
| 1900                                                                      | 1.96E+03 | 1.98E+03 | 2.00E+03 | 1.01 | 1.02 | 1.96E+03 |
| 2000                                                                      | 6.97E+03 | 7.04E+03 | 7.04E+03 | 1.01 | 1.01 | 6.72E+03 |



**Table 10S.** Unimolecular rate constants  $k_8$  ( $s^{-1}$ ) of R8 for the reported **MePr** reaction channels obtained by means of TST, TST/W, TST/Eck, W(T), Eck(T) and RRKM theories ( $T = 400\text{--}2000$  K,  $P = 1$  atm).

| $k_8$ , R8, MePr $\rightarrow$ [CH <sub>3</sub> CH=C(OH)OCH <sub>3</sub> ] |          |          |          |      |       |          |
|----------------------------------------------------------------------------|----------|----------|----------|------|-------|----------|
| $T$ K                                                                      | TST      | TST/W    | TST/Eck  | W    | Eck   | RRKM     |
| 400                                                                        | 2.11E-29 | 6.60E-29 | 1.42E-27 | 3.13 | 67.24 | 1.95E-29 |
| 500                                                                        | 5.14E-21 | 1.21E-20 | 3.51E-20 | 2.36 | 6.82  | 4.90E-21 |
| 600                                                                        | 2.05E-15 | 4.00E-15 | 6.60E-15 | 1.95 | 3.22  | 1.99E-15 |
| 700                                                                        | 2.10E-11 | 3.57E-11 | 4.70E-11 | 1.7  | 2.24  | 2.05E-11 |
| 800                                                                        | 2.15E-08 | 3.29E-08 | 3.91E-08 | 1.53 | 1.82  | 2.12E-08 |
| 900                                                                        | 4.79E-06 | 6.80E-06 | 7.62E-06 | 1.42 | 1.59  | 4.73E-06 |
| 1000                                                                       | 3.63E-04 | 4.86E-04 | 5.26E-04 | 1.34 | 1.45  | 3.60E-04 |
| 1100                                                                       | 1.26E-02 | 1.61E-02 | 1.70E-02 | 1.28 | 1.35  | 1.25E-02 |
| 1200                                                                       | 2.44E-01 | 3.03E-01 | 3.15E-01 | 1.24 | 1.29  | 2.42E-01 |
| 1300                                                                       | 2.99E+00 | 3.59E+00 | 3.71E+00 | 1.2  | 1.24  | 2.98E+00 |
| 1400                                                                       | 2.57E+01 | 3.01E+01 | 3.08E+01 | 1.17 | 1.2   | 2.56E+01 |
| 1500                                                                       | 1.66E+02 | 1.91E+02 | 1.96E+02 | 1.15 | 1.18  | 1.66E+02 |
| 1600                                                                       | 8.54E+02 | 9.65E+02 | 9.82E+02 | 1.13 | 1.15  | 8.48E+02 |
| 1700                                                                       | 3.62E+03 | 4.05E+03 | 4.09E+03 | 1.12 | 1.13  | 3.57E+03 |
| 1800                                                                       | 1.31E+04 | 1.45E+04 | 1.47E+04 | 1.11 | 1.12  | 1.28E+04 |
| 1900                                                                       | 4.14E+04 | 4.51E+04 | 4.60E+04 | 1.09 | 1.11  | 3.97E+04 |
| 2000                                                                       | 1.17E+05 | 1.28E+05 | 1.29E+05 | 1.09 | 1.1   | 1.09E+05 |

**Table 11S.** Unimolecular rate constants  $k_9$  ( $\text{s}^{-1}$ ) of R9 for the reported **MePr** reaction channels obtained by means of TST, TST/W, TST/Eck, W(T), Eck (T) and RRKM theories ( $T = 400\text{--}2000$  K,  $P = 1$  atm)

| $k_9$ , R9, MePr $\rightarrow$ CH <sub>3</sub> CH <sub>2</sub> OCH <sub>3</sub> + CO |          |          |          |      |      |          |
|--------------------------------------------------------------------------------------|----------|----------|----------|------|------|----------|
| $T$ K                                                                                | TST      | TST/W    | TST/Eck  | W    | Eck  | RRKM     |
| 400                                                                                  | 2.82E-44 | 3.92E-44 | 4.34E-44 | 1.39 | 1.54 | 3.25E-44 |
| 500                                                                                  | 8.84E-33 | 1.11E-32 | 1.16E-32 | 1.25 | 1.31 | 1.02E-32 |
| 600                                                                                  | 4.27E-25 | 5.04E-25 | 5.12E-25 | 1.18 | 1.2  | 4.97E-25 |
| 700                                                                                  | 1.35E-19 | 1.53E-19 | 1.54E-19 | 1.13 | 1.14 | 1.57E-19 |
| 800                                                                                  | 1.82E-15 | 2.00E-15 | 2.02E-15 | 1.1  | 1.11 | 2.13E-15 |
| 900                                                                                  | 3.00E-12 | 3.24E-12 | 3.24E-12 | 1.08 | 1.08 | 3.51E-12 |
| 1000                                                                                 | 1.13E-09 | 1.20E-09 | 1.21E-09 | 1.06 | 1.07 | 1.33E-09 |
| 1100                                                                                 | 1.46E-07 | 1.53E-07 | 1.55E-07 | 1.05 | 1.06 | 1.71E-07 |
| 1200                                                                                 | 8.41E-06 | 8.75E-06 | 8.83E-06 | 1.04 | 1.05 | 9.85E-06 |
| 1300                                                                                 | 2.60E-04 | 2.70E-04 | 2.70E-04 | 1.04 | 1.04 | 3.04E-04 |
| 1400                                                                                 | 4.93E-03 | 5.08E-03 | 5.08E-03 | 1.03 | 1.03 | 5.77E-03 |
| 1500                                                                                 | 6.32E-02 | 6.51E-02 | 6.51E-02 | 1.03 | 1.03 | 7.40E-02 |
| 1600                                                                                 | 5.90E-01 | 6.02E-01 | 6.08E-01 | 1.02 | 1.03 | 6.90E-01 |
| 1700                                                                                 | 4.23E+00 | 4.31E+00 | 4.31E+00 | 1.02 | 1.02 | 4.95E+00 |
| 1800                                                                                 | 2.44E+01 | 2.49E+01 | 2.49E+01 | 1.02 | 1.02 | 2.85E+01 |
| 1900                                                                                 | 1.17E+02 | 1.19E+02 | 1.19E+02 | 1.02 | 1.02 | 1.36E+02 |
| 2000                                                                                 | 4.82E+02 | 4.92E+02 | 4.92E+02 | 1.02 | 1.02 | 5.56E+02 |

**Table 12S.** Unimolecular rate constants  $k_{10}$  ( $s^{-1}$ ) of R10 for the reported **MePr** reaction channels obtained by means of TST, TST/W, TST/Eck, W(T), Eck (T) and RRKM theories ( $T = 400\text{--}2000$  K,  $P = 1$  atm).

| $k_{10}$ , R10, MePr $\rightarrow$ CH <sub>3</sub> CH <sub>2</sub> CH <sub>3</sub> + CO <sub>2</sub> |          |          |          |      |     |          |
|------------------------------------------------------------------------------------------------------|----------|----------|----------|------|-----|----------|
| $T$ K                                                                                                | TST      | TST/W    | TST/Eck  | W    | Eck | RRKM     |
| 400                                                                                                  | 4.06E-40 | 3.12E-40 | 4.06E-40 | 1.1  | 1   | 2.65E-40 |
| 500                                                                                                  | 1.21E-29 | 8.90E-30 | 1.21E-29 | 1.06 | 1   | 8.06E-30 |
| 600                                                                                                  | 1.22E-22 | 8.76E-23 | 1.22E-22 | 1.04 | 1   | 8.21E-23 |
| 700                                                                                                  | 1.26E-17 | 8.97E-18 | 1.26E-17 | 1.03 | 1   | 8.56E-18 |
| 800                                                                                                  | 7.37E-14 | 5.20E-14 | 7.37E-14 | 1.02 | 1   | 5.04E-14 |
| 900                                                                                                  | 6.35E-11 | 4.52E-11 | 6.35E-11 | 1.02 | 1   | 4.37E-11 |
| 1000                                                                                                 | 1.43E-08 | 1.02E-08 | 1.43E-08 | 1.02 | 1   | 9.84E-09 |
| 1100                                                                                                 | 1.20E-06 | 8.44E-07 | 1.20E-06 | 1.01 | 1   | 8.32E-07 |
| 1200                                                                                                 | 4.86E-05 | 3.41E-05 | 4.86E-05 | 1.01 | 1   | 3.37E-05 |
| 1300                                                                                                 | 1.11E-03 | 7.87E-04 | 1.11E-03 | 1.01 | 1   | 7.74E-04 |
| 1400                                                                                                 | 1.63E-02 | 1.15E-02 | 1.63E-02 | 1.01 | 1   | 1.14E-02 |
| 1500                                                                                                 | 1.68E-01 | 1.19E-01 | 1.68E-01 | 1.01 | 1   | 1.17E-01 |
| 1600                                                                                                 | 1.29E00  | 9.15E-01 | 1.29E00  | 1.01 | 1   | 9.00E-01 |
| 1700                                                                                                 | 7.79E00  | 5.53E+00 | 7.79E00  | 1.01 | 1   | 5.44E+00 |
| 1800                                                                                                 | 3.86E+01 | 2.69E+01 | 3.86E+01 | 1    | 1   | 2.70E+01 |
| 1900                                                                                                 | 1.62E+02 | 1.13E+02 | 1.62E+02 | 1    | 1   | 1.13E+02 |
| 2000                                                                                                 | 5.87E+02 | 4.10E+02 | 5.87E+02 | 1    | 1   | 4.09E+02 |

**Table 13S.** Branching ratios ( $\Gamma$ ) of complex fission reactions (R1-R10) in the overall reaction of MePr decomposition.

| <i>TK</i> | $\Gamma1$ | $\Gamma2$ | $\Gamma3$ | $\Gamma4$ | $\Gamma5$ | $\Gamma6$ | $\Gamma7$ | $\Gamma8$ | $\Gamma9$ | $\Gamma10$ |
|-----------|-----------|-----------|-----------|-----------|-----------|-----------|-----------|-----------|-----------|------------|
| 400       | 0.00      | 0.00      | 0.18      | 0.00      | 2.22      | 0.00      | 0.00      | 97.59     | 0.00      | 0.00       |
| 500       | 0.00      | 0.00      | 1.78      | 0.00      | 11.15     | 0.00      | 0.00      | 85.28     | 0.00      | 0.00       |
| 600       | 0.00      | 0.00      | 3.18      | 0.00      | 16.77     | 0.00      | 0.00      | 62.69     | 0.00      | 0.00       |
| 700       | 0.00      | 0.00      | 2.86      | 0.00      | 12.37     | 0.00      | 0.00      | 34.98     | 0.00      | 0.00       |
| 800       | 0.00      | 0.00      | 1.84      | 0.00      | 7.48      | 0.00      | 0.00      | 16.61     | 0.00      | 0.00       |
| 900       | 0.00      | 0.00      | 1.15      | 0.00      | 4.53      | 0.00      | 0.00      | 8.18      | 0.00      | 0.00       |
| 1000      | 0.00      | 0.00      | 0.76      | 0.00      | 2.96      | 0.00      | 0.00      | 4.50      | 0.00      | 0.00       |
| 1100      | 0.00      | 0.00      | 0.54      | 0.01      | 2.09      | 0.00      | 0.00      | 2.75      | 0.00      | 0.00       |
| 1200      | 0.00      | 0.00      | 0.42      | 0.01      | 1.58      | 0.00      | 0.00      | 1.87      | 0.00      | 0.00       |
| 1300      | 0.00      | 0.00      | 0.33      | 0.01      | 1.27      | 0.00      | 0.00      | 1.37      | 0.00      | 0.00       |
| 1400      | 0.00      | 0.00      | 0.28      | 0.02      | 1.07      | 0.00      | 0.00      | 1.06      | 0.00      | 0.00       |
| 1500      | 0.00      | 0.00      | 0.25      | 0.03      | 0.93      | 0.00      | 0.01      | 0.87      | 0.00      | 0.00       |
| 1600      | 0.00      | 0.00      | 0.22      | 0.04      | 0.83      | 0.00      | 0.01      | 0.72      | 0.00      | 0.00       |
| 1700      | 0.00      | 0.00      | 0.20      | 0.09      | 0.76      | 0.00      | 0.01      | 0.63      | 0.00      | 0.00       |
| 1800      | 0.00      | 0.00      | 0.19      | 0.06      | 0.71      | 0.00      | 0.01      | 0.57      | 0.00      | 0.00       |
| 1900      | 0.00      | 0.00      | 0.18      | 0.08      | 0.67      | 0.00      | 0.01      | 0.51      | 0.00      | 0.00       |
| 2000      | 0.00      | 0.00      | 0.17      | 0.09      | 0.65      | 0.00      | 0.01      | 0.48      | 0.00      | 0.00       |

**Table 14S.** Branching ratios ( $\Gamma$ ) of simple bond fission (R11-R17) in the overall reaction of MePr decomposition.

| <i>TK</i> | <i><math>\Gamma_{11}</math></i> | <i><math>\Gamma_{12}</math></i> | <i><math>\Gamma_{13}</math></i> | <i><math>\Gamma_{14}</math></i> | <i><math>\Gamma_{15}</math></i> | <i><math>\Gamma_{16}</math></i> | <i><math>\Gamma_{17}</math></i> |
|-----------|---------------------------------|---------------------------------|---------------------------------|---------------------------------|---------------------------------|---------------------------------|---------------------------------|
| 400       | 0.01                            | 0.00                            | 0.00                            | 0.01                            | 0.00                            | 0.00                            | 0.00                            |
| 500       | 0.93                            | 0.00                            | 0.00                            | 0.86                            | 0.00                            | 0.00                            | 0.00                            |
| 600       | 8.22                            | 0.07                            | 0.00                            | 9.07                            | 0.00                            | 0.00                            | 0.00                            |
| 700       | 21.82                           | 0.46                            | 0.00                            | 27.51                           | 0.00                            | 0.00                            | 0.00                            |
| 800       | 30.55                           | 1.19                            | 0.01                            | 42.33                           | 0.00                            | 0.00                            | 0.00                            |
| 900       | 33.60                           | 2.11                            | 0.02                            | 50.42                           | 0.00                            | 0.00                            | 0.00                            |
| 1000      | 34.03                           | 3.13                            | 0.03                            | 54.58                           | 0.00                            | 0.01                            | 0.00                            |
| 1100      | 33.70                           | 4.20                            | 0.06                            | 56.64                           | 0.00                            | 0.01                            | 0.00                            |
| 1200      | 32.97                           | 5.28                            | 0.10                            | 57.75                           | 0.00                            | 0.02                            | 0.00                            |
| 1300      | 32.10                           | 6.36                            | 0.14                            | 58.37                           | 0.00                            | 0.02                            | 0.01                            |
| 1400      | 31.17                           | 7.44                            | 0.20                            | 58.71                           | 0.00                            | 0.03                            | 0.01                            |
| 1500      | 30.39                           | 8.45                            | 0.26                            | 58.76                           | 0.01                            | 0.04                            | 0.02                            |
| 1600      | 29.92                           | 9.41                            | 0.34                            | 58.44                           | 0.01                            | 0.05                            | 0.02                            |
| 1700      | 28.82                           | 10.37                           | 0.42                            | 58.59                           | 0.02                            | 0.06                            | 0.03                            |
| 1800      | 28.24                           | 11.30                           | 0.51                            | 58.28                           | 0.02                            | 0.07                            | 0.05                            |
| 1900      | 27.50                           | 12.13                           | 0.60                            | 58.15                           | 0.03                            | 0.08                            | 0.06                            |
| 2000      | 26.97                           | 12.95                           | 0.70                            | 57.76                           | 0.04                            | 0.10                            | 0.08                            |

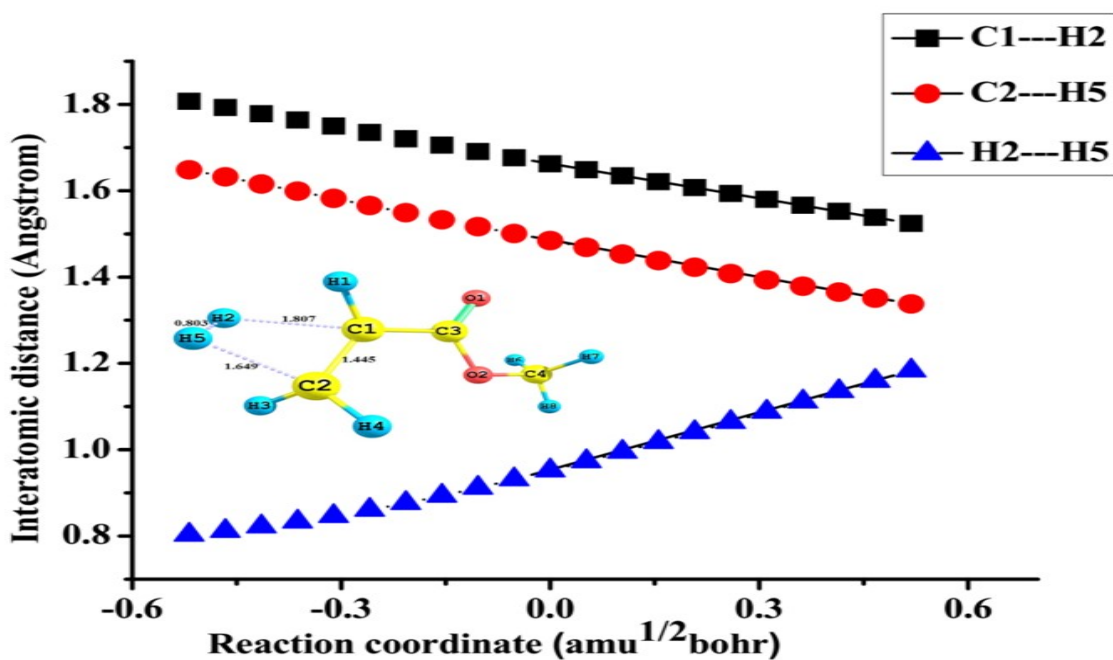

Fig. 1S. Variation of bond distances along the reaction coordinate for TS1, formation of methyl acrylate and hydrogen.

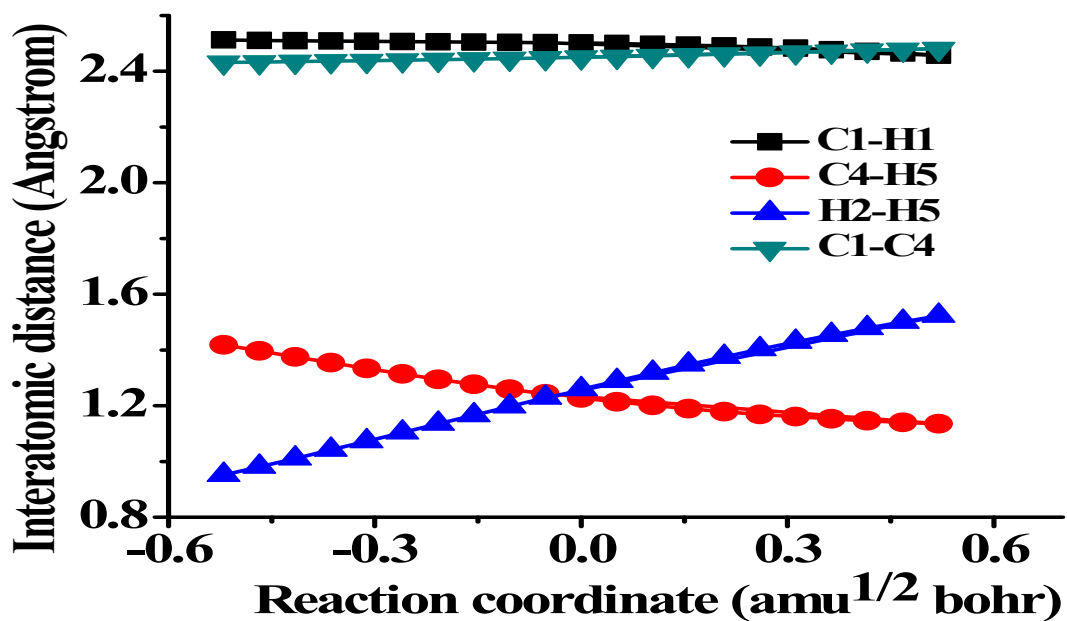

Fig. 2S. Variation of bond distances along the reaction coordinate for TS2, formation of lactone and hydrogen.

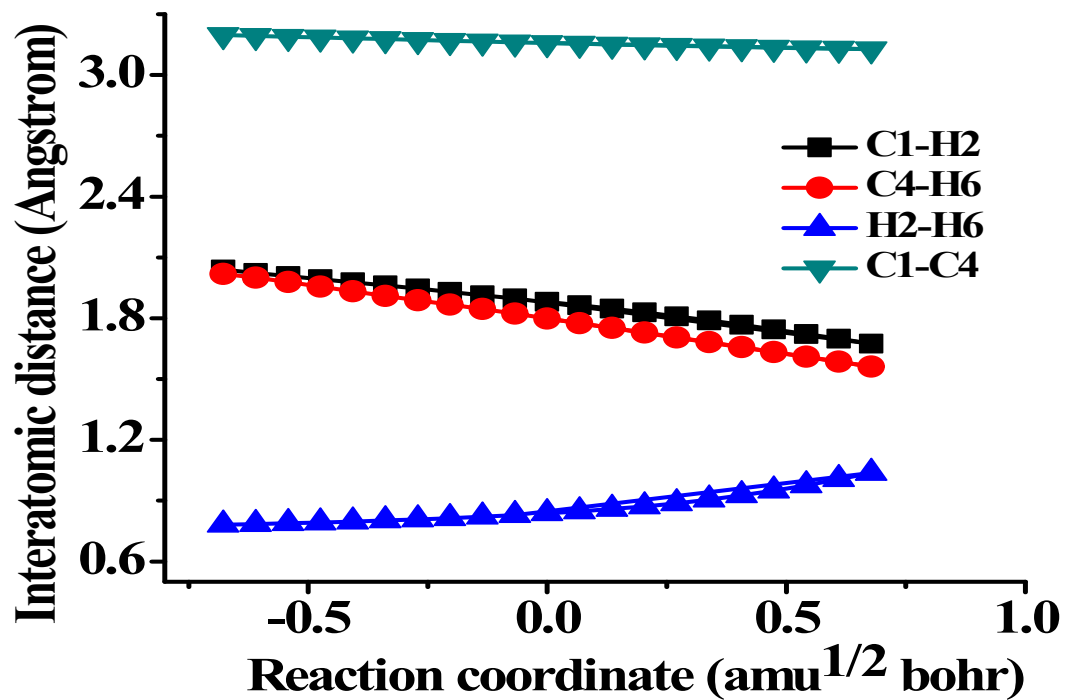

Fig. 3S. Variation of bond distances along the reaction coordinate for TS3, formation of lactone and hydrogen.

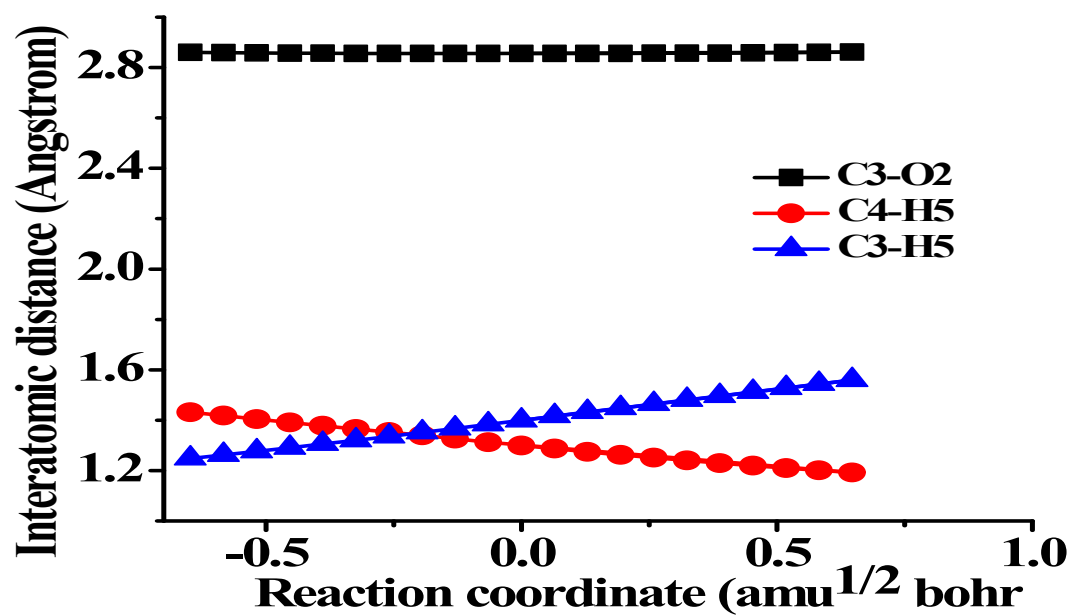

Fig. 4S. Variation of bond distances along the reaction coordinate for TS4, formation of propanal and formaldehyde.

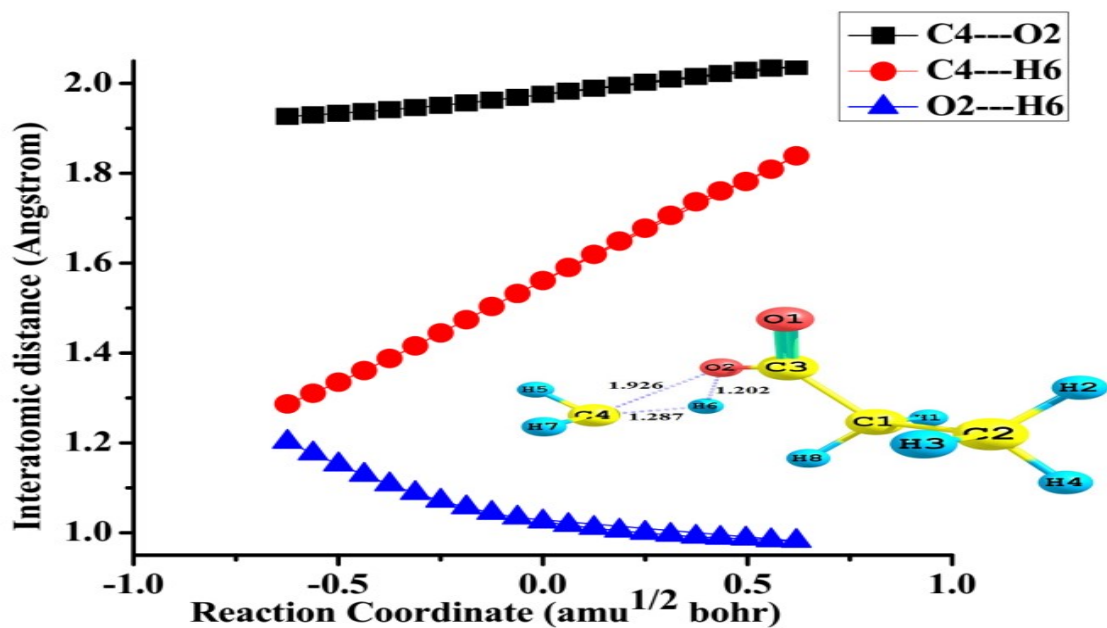

Fig. 5S. Variation of bond distances along the reaction coordinate for TS5, formation of propanoic acid and methene.

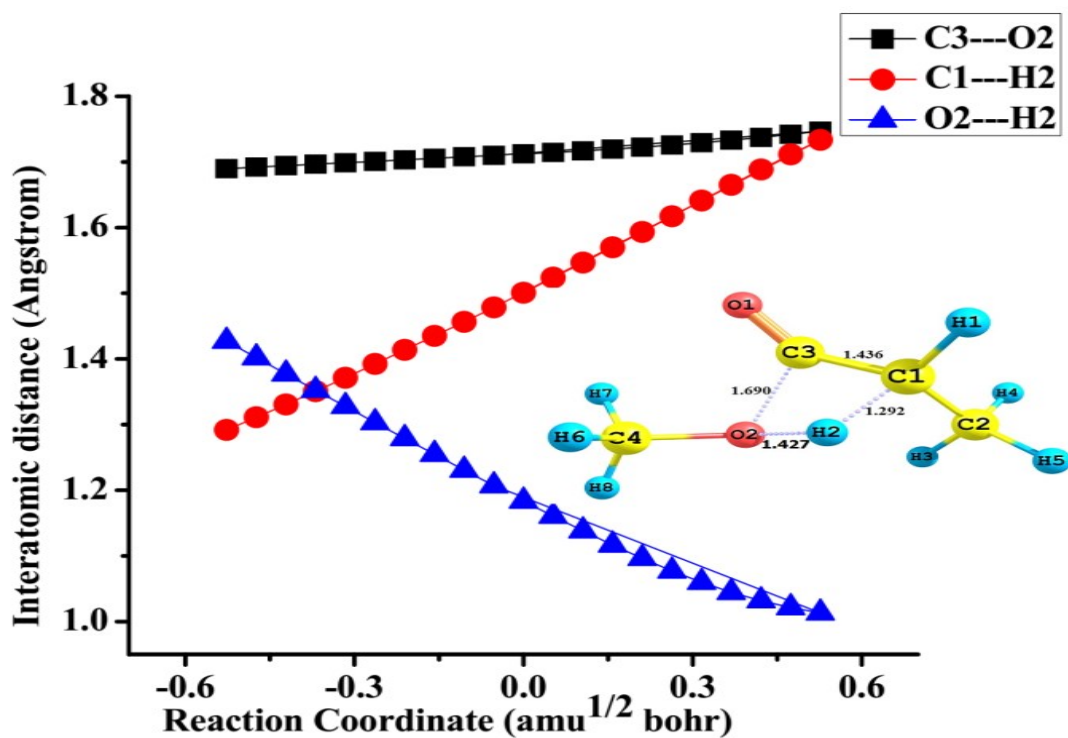

Fig. 6S. Variation of bond distances along the reaction coordinate for TS6, formation of propenone and methanol.



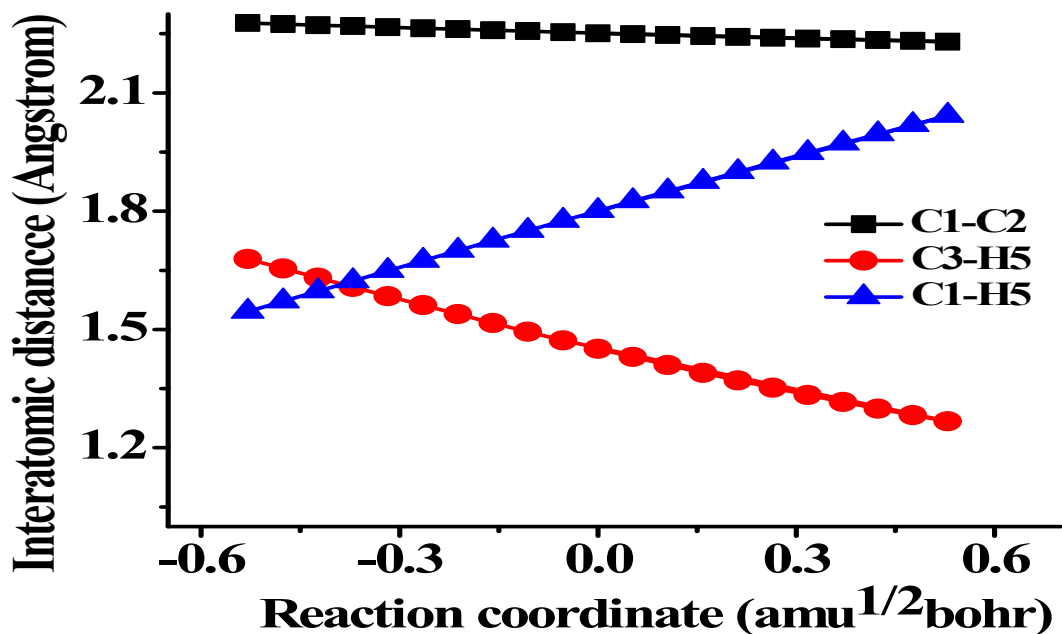

Fig. 7S. Variation of bond distances along the reaction coordinate for TS7, formation of methoxynal and ethene.

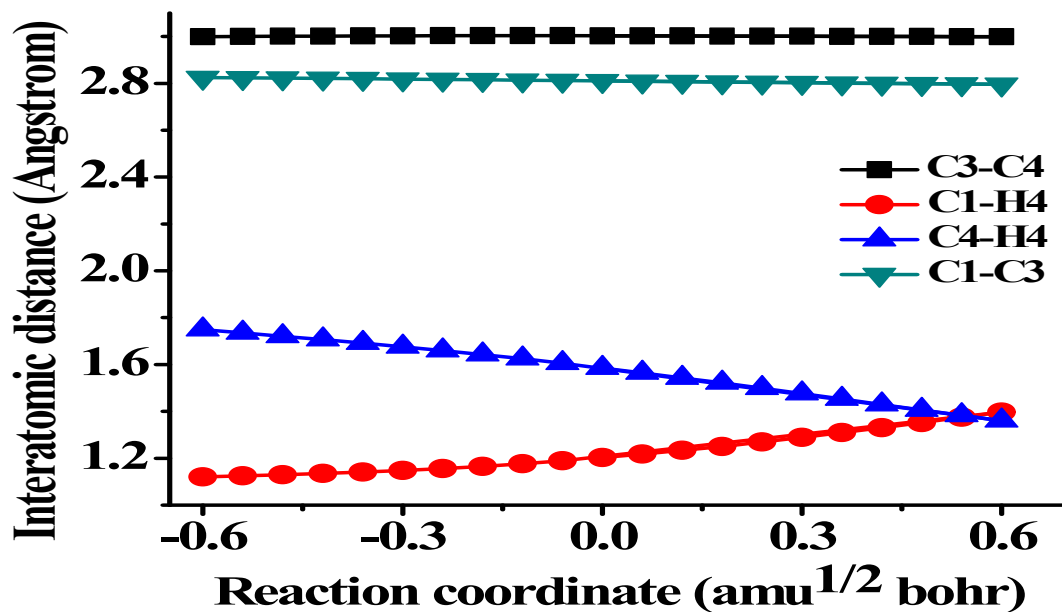

Fig. 8S. Variation of bond distances along the reaction coordinate for TS8, formation of lactone and methane.

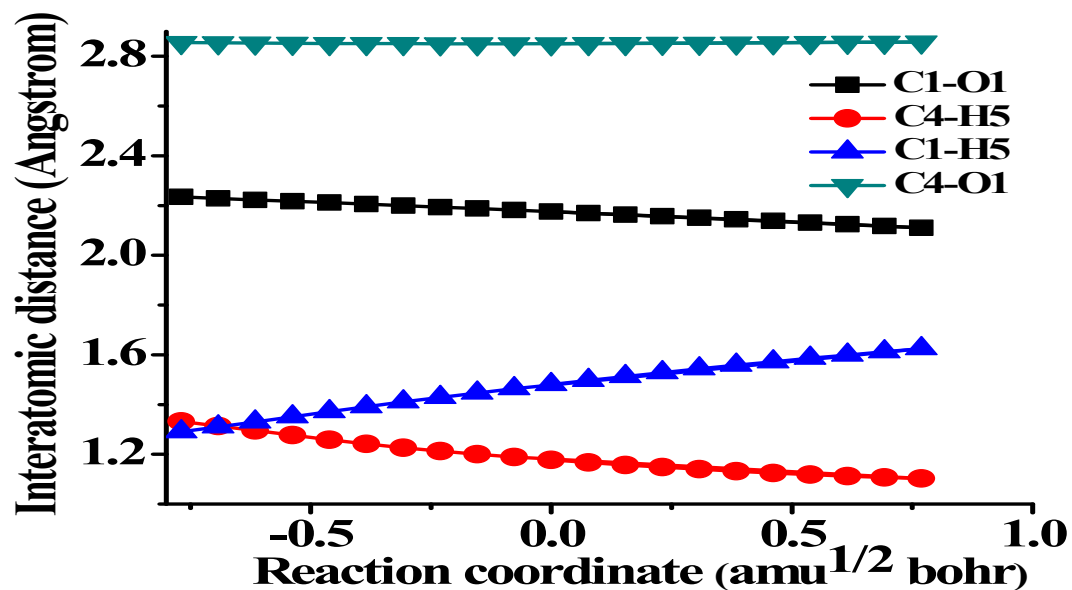

Fig. 9S. Variation of bond distances along the reaction coordinate for TS9, formation of lactone and methane.

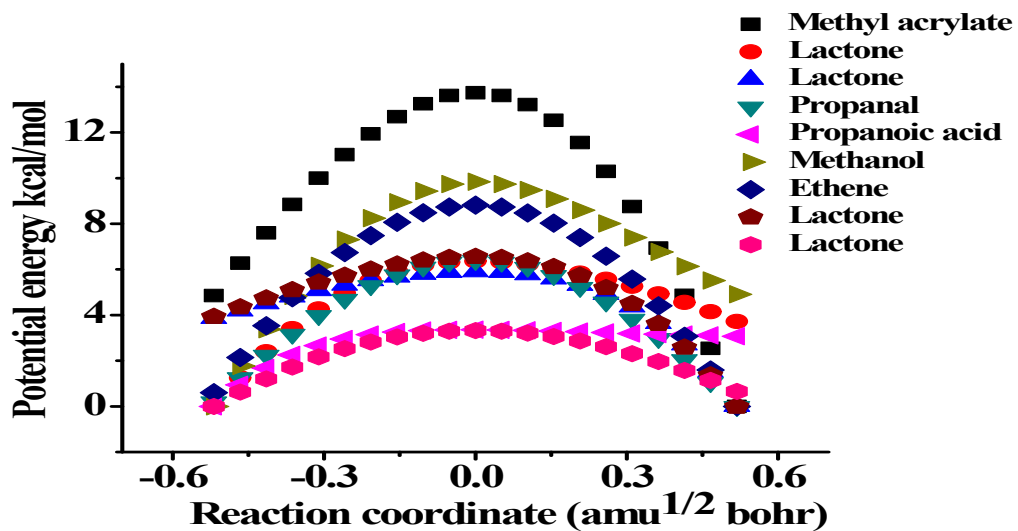

Fig. 10S. Potential energy profile along MEP from the IRC calculation of MePr decomposition reactions.

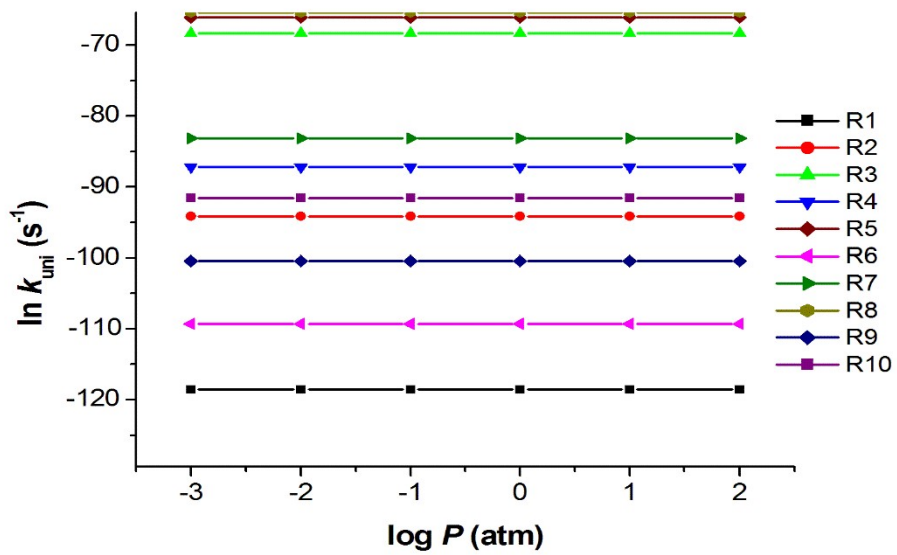

a)  $T=400 \text{ K}$

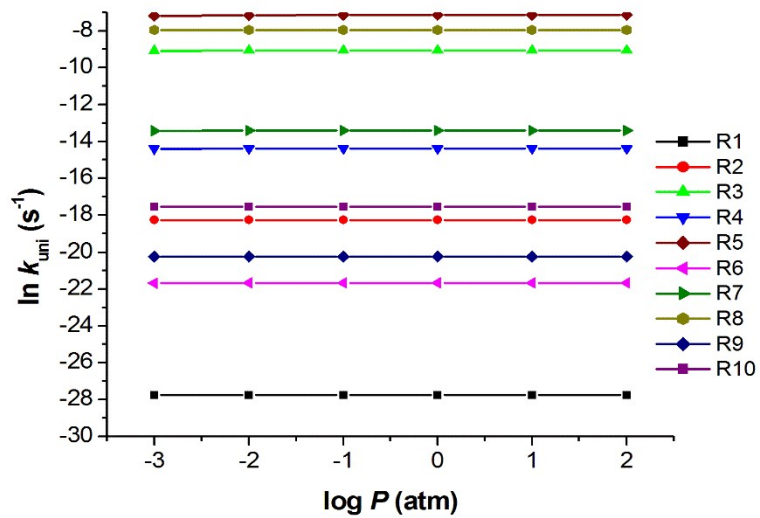

b)  $T=1000 \text{ K}$

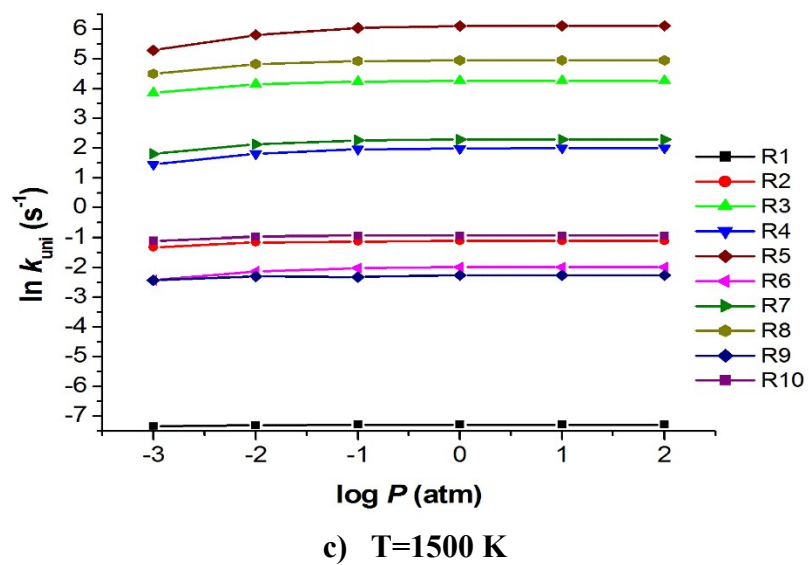

**Fig. 11S.** Calculated pressure-dependent RRKM rate constants for R1–R10 at 400 K, 1000 K, and 1500 K
